# Supplementary material for: Large–Scale Transposon Mutagenesis Reveals Type III Secretion Effector HopR1 Is a Major Virulence Factor in Pseudomonas syringae pv. actinidiae
Source: MDPI journal article supplement (doi:10.3390/plants12010141), 2022-12-27
Supplement: s1 [file s1]

**Table S1.** Number of genes within each functional category (N = 91) from Psa3 transposon disruption screening.

| Classification                                | Number |
|-----------------------------------------------|--------|
| T3SS /T3SEs                                   | 11     |
| Nucleotide metabolism and transport           | 10     |
| DNA processing and modification               | 9      |
| Hypothetical protein                          | 8      |
| Transporters                                  | 8      |
| Cell motility/Chemotaxis/Adhesion             | 7      |
| Signal transduction/Transcriptional regulator | 7      |
| Amino acid metabolism and transport           | 5      |
| Carbohydrate transport and metabolism         | 5      |
| Others                                        | 4      |
| Lipid metabolism and transport                | 4      |
| Membrane                                      | 3      |
| Peptidase                                     | 3      |
| Glycosyl transferase                          | 2      |
| Type IV secretion system                      | 2      |
| Xenobiotics biodegradation and metabolism     | 2      |
| Sulfur metabolism                             | 1      |

Functional category annotations for Psa3 genes are primarily based on COG [72] and KEGG [73] annotations, with manual additions.

**Table S2.** Characteristics of Psa3 type III secretion system and effector mutants.

| Classification | Mutant | Gene locus  | Gene          | Function     | Virulence Score |
|----------------|--------|-------------|---------------|--------------|-----------------|
| T3SS           | TD35   | IYO_RS06775 | <i>hrpR</i>   | Regulator    | 0               |
| T3SS           | TJ40   | IYO_RS06855 | <i>hrcR</i>   | Secretion    | 0               |
| T3SS           | TAd35  | IYO_RS06770 | <i>hrpH</i>   | Translocator | 2.67            |
| T3SS           | TAh32  | IYO_RS06840 | <i>hrcU</i>   | Secretion    | 0               |
| T3SS           | TAI39  | IYO_RS06775 | <i>hrpR</i>   | Regulator    | 0               |
| T3SS           | TAw18  | IYO_RS06905 | <i>hrpK1</i>  | Translocator | 0.67            |
| T3SE           | TBi11  | IYO_RS06800 | <i>hrcJ</i>   | Secretion    | 0               |
| T3SE           | TM33   | IYO_RS28930 | <i>hopZ3</i>  | Effector     | 3.67            |
| T3SE           | TR23   | IYO_RS24135 | <i>hopR1</i>  | Effector     | 0.67            |
| T3SE           | TBr13  | IYO_RS25475 | <i>hopAC1</i> | Effector     | 3               |

**Table S3.** Primer sets used in this study

| Gene                           | Description                                | Forward primer            | Reverse primer            | Reference  |
|--------------------------------|--------------------------------------------|---------------------------|---------------------------|------------|
| <i>hopR1</i>                   | Psa3 Type III effector protein HopR1       | TGAGCCAGAGAGGGATGAA       | TGATGCGGTGTGCTGATAC       | [44]       |
| <i>fbp</i>                     | Psa3 Fructose-bisphosphate aldolase        | TTCTTGCGCCACCTGATTCT      | GGATCGAACGCTGGCAGATA      | [68]       |
| <i>parA</i>                    | Psa3 Chromosome partitioning protein ParA  | CAACCTGCACGAAGTATGTC      | GTCCTGCTCATGAGTCGCTT      | [68]       |
| <i>tetR</i>                    | Psa3 TetR family transcriptional regulator | TGACCCATGGCGGTTTCTAC      | GCGTGACTCAATGCCTGTTC      | [68]       |
| <i>PR1</i><br>(Ach26g253311)   | Kiwifruit defense marker                   | ATAGGGACGTTGTCCAATGACG    | CAAGTGGTTTGGAGCAGATCG     | [69]       |
| <i>PR1</i><br>(Ach07g240741.2) | Kiwifruit defense marker                   | ATCGTAATTGCAAGTGACAAACCAC | GGGAGAATGCTTGCACTATACACAA | This study |
| <i>ACT</i>                     | Kiwifruit actin                            | GTCTGCGATACCAGGGAACAT     | GCAGGAATCCATGAGACTACC     | [69]       |
| <i>UBQ</i>                     | Kiwifruit ubiquitin Z                      | TGCAGATCTTCGTGAAAACC      | CCACCACGGAGACGGAGCAC      | [70]       |
