# Supplementary material for: Large–Scale Transposon Mutagenesis Reveals Type III Secretion Effector HopR1 Is a Major Virulence Factor in Pseudomonas syringae pv. actinidiae
Source: Plants (Basel). 2022 Dec 27;12(1):141. doi: 10.3390/plants12010141 (PMC9823363; doi:10.3390/plants12010141)
Supplement: Supplementary file 1 [file plants-12-00141-s001.zip › Spreadsheets.xlsx]

## Sheet: Fig2B
	Weight	Colony (4)	Log(CFU/mg)	Average		Log(CFU/mg)	Average	SE	t-test		0 time	7 dpi	0 time	7 dpi
D35-1	0.27	0.047	3.24073		Psa3-1	6.67966				Psa3	3.67385	6.5647	0.0342486	0.0564509
D35-2	0.27	0.011	2.61003		Psa3-2	6.39794				TD35	3.63436	2.73671	0.0552621	0.248486
D35-3	0.26	0.001	1.58503	2.4786	Psa3-3	6.60879				TJ40	2.79405	2.50364	0.164315	0.24735
J40-1	0.26	0.003	2.06215		Psa3-1	6.3827				TAd35	4.04642	5.42193	0.0406686	0.118346
J40-2	0.22	0.029	3.11998		Psa3-2	6.68707				TAh32	3.38088	3.93403	0.150524	0.384583
J40-3	0.22	0.044	3.30103	2.82772	Psa3-3	6.63202	6.5647	0.0564509		TAl39	3.4984	2.98436	0.0572895	0.308478
M33-1	0.49	45	5.96302		D35-1	3.24073				TAw18	3.46598	4.56998	0.205814	0.359253
M33-2	0.26	11	5.62642		D35-2	2.61003				TBi11	2.99294	2.66635	0.187114	0.138979
M33-3	0.27	22	5.91106	5.8335	D35-3	1.58503				TM33	3.13416	5.51053	0.18862	0.164422
R23-1	0.25	5	5.30103		D35-1	3.09691				TR23	3.5091	4.56379	0.121128	0.321729
R23-2	0.26	6	5.36318		D35-2	2.80163				TBr13	3.18411	5.22991	0.0889251	0.404481
R23-3	0.52	4.5	4.93721	5.20047	D35-3	3.08591	2.73671	0.248486	3.4464e-08	TBw35	3.4445	5.02727	0.0621748	0.426319
Ah32-1	0.49	3	4.78693		J40-1	2.06215
Ah32-2	0.42	1.2	4.45593		J40-2	3.11998
Ah32-3	0.44	4.2	4.9798	4.74088	J40-3	3.30103
Al39-1	0.31	0.27	3.94		J40-1	1.87037
Al39-2	0.31	0.05	3.20761		J40-2	2.62258
Al39-3	0.29	0.103	3.55044	3.56602	J40-3	2.04576	2.50364	0.24735	1.87004e-08
Aw18-1	0.46	10	5.33724		M33-1	5.96302
Aw18-2	0.44	11	5.39794		M33-2	5.62642
Aw18-3	0.35	4	5.05799	5.26439	M33-3	5.91106
Bi11-1	0.24	0.01	2.61979		M33-1	5.3098
Bi11-2	0.2	0.01	2.69897		M33-2	4.9061
Bi11-3	0.21	0.01	2.67778	2.66551	M33-3	5.34679	5.51053	0.164422	0.00012135
Br13-1	0.33	61	6.26682		R23-1	5.30103
Br13-2	0.37	37	6		R23-2	5.36318
Br13-3	0.39	46	6.07169	6.11284	R23-3	4.93721
Bw35-1	0.31	15	5.68473		R23-1	3.49732
Bw35-2	0.3	11	5.56427		R23-2	3.76112
Bw35-3	0.3	78	6.41497	5.88799	R23-3	4.52288	4.56379	0.321729	0.000111846
Psa3-1	0.23	110	6.67966		Ad35-1	5.39794
Psa3-2	0.16	40	6.39794		Ad35-2	5.78915
Psa3-3	0.32	130	6.60879	6.56213	Ad35-3	4.91186
					Ad35-4	5.49485
D35-1	0.36	0.045	3.09691		Ad35-5	5.3827
D35-2	0.3	0.019	2.80163		Ad35-6	5.55506	5.42193	0.118346	5.51861e-06
D35-3	0.32	0.039	3.08591	2.99482	Ah32-1	4.78693
J40-1	0.31	0.0023	1.87037		Ah32-2	4.45593
J40-2	0.31	0.013	2.62258		Ah32-3	4.9798
J40-3	0.45	0.005	2.04576	2.17957	Ah32-1	3.24988
M33-1	0.49	10	5.3098		Ah32-2	3.49485
M33-2	0.36	2.9	4.9061		Ah32-3	2.63682	3.93403	0.384583	4.93265e-05
M33-3	0.36	8	5.34679	5.18756	Al39-1	3.94
R23-1	0.35	0.11	3.49732		Al39-2	3.20761
R23-2	0.52	0.3	3.76112		Al39-3	3.55044
R23-3	0.45	1.5	4.52288	3.92711	Al39-1	2.87506
Ah32-1	0.45	0.08	3.24988		Al39-2	2.4994
Ah32-2	0.32	0.1	3.49485		Al39-3	1.83367	2.98436	0.308478	4.66049e-07
Ah32-3	0.3	0.013	2.63682	3.12718	Aw18-1	5.33724
Al39-1	0.28	0.021	2.87506		Aw18-2	5.39794
Al39-2	0.38	0.012	2.4994		Aw18-3	5.05799
Al39-3	0.44	0.003	1.83367	2.40271	Aw18-1	3.87221
Aw18-1	0.51	0.38	3.87221		Aw18-2	4.55284
Aw18-2	0.42	1.5	4.55284		Aw18-3	3.20165	4.56998	0.359253	0.000267318
Aw18-3	0.44	0.07	3.20165	3.87557	Bi11-1	2.61979
Bi11-1	0.3	0.007	2.36798		Bi11-2	2.69897
Bi11-2	0.31	0.06	3.28679		Bi11-3	2.67778
Bi11-3	0.27	0.006	2.34679	2.66718	Bi11-1	2.36798
Br13-1	0.5	1	4.30103		Bi11-2	3.28679
Br13-2	0.42	2	4.67778		Bi11-3	2.34679	2.66635	0.138979	1.63729e-10
Br13-3	0.52	0.6	4.06215	4.34699	Br13-1	6.26682
Bw35-1	0.33	2	4.78252		Br13-2	6
Bw35-2	0.41	0.36	3.94352		Br13-3	6.07169
Bw35-3	0.32	0.19	3.7736	4.16655	Br13-1	4.30103
Ad35-1	0.4	10	5.39794		Br13-2	4.67778
Ad35-2	0.52	32	5.78915		Br13-3	4.06215	5.22991	0.404481	0.00845423
Ad35-3	0.49	4	4.91186	5.36632	Bw35-1	5.68473
Ad35-4	0.32	10	5.49485		Bw35-2	5.56427
Ad35-5	0.29	7	5.3827		Bw35-3	6.41497
Ad35-6	0.39	14	5.55506	5.47754	Bw35-1	4.78252
Psa3-1	0.29	70	6.3827		Bw35-2	3.94352
Psa3-2	0.37	180	6.68707		Bw35-3	3.7736	5.02727	0.426319	0.00505286
Psa3-3	0.35	150	6.63202	6.56726
0 time			colony(2)
D35-1	0.18	10	3.74473
D35-2	0.24	9	3.57403
D35-3	0.25	9.6	3.58433	3.63436	0.0552621
J40-1	0.28	3.3	3.07136
J40-2	0.28	1.8	2.80811
J40-3	0.22	0.7	2.50268	2.79405	0.164315
M33-1	0.19	5	3.42022
M33-2	0.25	4	3.20412
M33-3	0.25	1.5	2.77815	3.13416	0.18862
R23-1	0.2	11	3.74036
R23-2	0.28	8	3.45593
R23-3	0.28	6	3.33099	3.5091	0.121128
Ah32-1	0.25	3.1	3.09342
Ah32-2	0.2	5.6	3.44716
Ah32-3	0.3	12	3.60206	3.38088	0.150524
Al39-1	0.24	9	3.57403
Al39-2	0.37	9	3.38604
Al39-3	0.35	12	3.53511	3.4984	0.0572895
Aw18-1	0.25	5	3.30103
Aw18-2	0.3	5	3.22185
Aw18-3	0.24	18	3.87506	3.46598	0.205814
Bi11-1	0.25	4	3.20412
Bi11-2	0.28	4	3.1549
Bi11-3	0.24	1	2.61979	2.99294	0.187114
Br13-1	0.3	5	3.22185
Br13-2	0.29	3	3.01472
Br13-3	0.29	6	3.31575	3.18411	0.0889251
Bw35-1	0.33	9	3.43573
Bw35-2	0.41	9	3.34146
Bw35-3	0.25	9	3.5563	3.4445	0.0621748
Psa3-1	0.31	14	3.65477
Psa3-2	0.2	11	3.74036
Psa3-3	0.26	11	3.62642	3.67385	0.0342486
Ad35-1	0.4	53	4.12222
Ad35-2	0.52	50	3.98297
Ad35-3	0.49	53	4.03408	4.04642	0.0406686

## Sheet: Fig2D
	Weight	Colony	Dillution	CFU/mg	Log(CFU/mg)			Log(CFU/mg)	Average	SE	t-test
D35-1	0.34	2	1	5.88235	0.769551		Psa3-1	5.751					0 time		7 dpi
D35-2	0.35	2	1	5.71429	0.756962		Psa3-2	5.96524				Psa3	1.04531	0.135828	6.03011	0.175401
D35-3	0.38	2	1	5.26316	0.721246		Psa3-3	5.52288				TD35	1.00036	0.18025	1.07051	0.166838
J40-1	0.33	2	1	6.06061	0.782516		Psa3-1	5.8365				TJ40	0.96989	0.237	1.05852	0.215461
J40-2	0.32	2	1	6.25	0.79588		Psa3-2	6.56348				TAd35	1.18662	0.181356	3.79832	0.176157
J40-3	0.34	2	1	5.88235	0.769551		Psa3-3	6.54158	6.03011	0.175401		TAh32	0.973205	0.138383	1.12112	0.233079
M33-1	0.45	40	100	8888.89	3.94885		D35-1	0.769551				TAl39	0.845071	0.100343	1.54176	0.187484
M33-2	0.62	33	10	532.258	2.72612		D35-2	0.756962				TAw18	1.31954	0.13741	3.85975	0.38467
M33-3	0.6	79	10	1316.67	3.11948		D35-3	0.721246				TBi11	1.08813	0.166257	0.953214	0.093552
R23-1	0.45	2	10	44.4444	1.64782		D35-1	1.1707				TM33	0.92976	0.0925163	4.05919	0.39617
R23-2	0.64	1	1	1.5625	0.19382		D35-2	1.23657				TR23	1.04635	0.107198	2.02699	0.504626
R23-3	0.63	17	1	26.9841	1.43111		D35-3	1.76805	1.07051	0.166838	1.6954e-09	TBr13	1.18709	0.1738	4.35642	0.196566
Ah32-1	0.48	2	1	4.16667	0.619789		J40-1	0.782516				TBw35	1.04531	0.191172	2.58107	0.572514
Ah32-2	0.47	6	10	127.66	2.10605		J40-2	0.79588
Ah32-3	0.46	2	1	4.34783	0.638272		J40-3	0.769551
Al39-1	0.43	6	1	13.9535	1.14468		J40-1	1.62642
Al39-2	0.44	15	1	34.0909	1.53264		J40-2	0.552842
Al39-3	0.43	11	1	25.5814	1.40792		J40-3	1.82391	1.05852	0.215461	6.34887e-09
Aw18-1	0.45	3	100	666.667	2.82391		Ad35-1	3.98069
Aw18-2	0.42	8	100	1904.76	3.27984		Ad35-2	3.63827
Aw18-3	0.46	40	10	869.565	2.9393		Ad35-3	3.05325
Br13-1	0.27	17	100	6296.3	3.79909		Ad35-4	3.88803
Br13-2	0.27	8	1000	29629.6	4.47173		Ad35-5	3.8819
Br13-3	0.27	128	100	47407.4	4.67585		Ad35-6	4.34777	3.79832	0.176157	4.23091e-06
Bi11-1	0.32	2	1	6.25	0.79588		Ah32-1	0.619789
Bi11-2	0.31	2	1	6.45161	0.809668		Ah32-2	2.10605
Bi11-3	0.31	2	1	6.45161	0.809668		Ah32-3	0.638272
Bw35-1	0.3	55	1	183.333	2.26324		Ah32-1	0.869666
Bw35-2	0.3	2	1	6.66667	0.823909		Ah32-2	1.44716
Bw35-3	0.3	62	1	206.667	2.31527		Ah32-3	1.04576	1.12112	0.233079	1.15217e-08
Psa3-1	0.55	31	10000	563636	5.751		Al39-1	1.14468
Psa3-2	0.65	60	10000	923077	5.96524		Al39-2	1.53264
Psa3-3	0.63	21	10000	333333	5.52288		Al39-3	1.40792
							Al39-1	1
D35-1	0.27	4	1	14.8148	1.1707		Al39-2	2.07255
D35-2	0.29	5	1	17.2414	1.23657		Al39-3	2.09275	1.54176	0.187484	7.96291e-09
D35-3	0.29	17	1	58.6207	1.76805		Aw18-1	2.82391
J40-1	0.26	11	1	42.3077	1.62642		Aw18-2	3.27984
J40-2	0.28	1	1	3.57143	0.552842		Aw18-3	2.9393
J40-3	0.27	18	1	66.6667	1.82391		Aw18-1	4.85387
M33-1	0.1	4	1000	40000	4.60206		Aw18-2	4.57899
M33-2	0.11	15	1000	136364	5.1347		Aw18-3	4.68258	3.85975	0.38467	0.000441826
M33-3	0.12	8	1000	66666.7	4.82391		Bi11-1	0.79588
R23-1	0.25	33	1	132	2.12057		Bi11-2	0.809668
R23-2	0.23	90	10	3913.04	3.59251		Bi11-3	0.809668
R23-3	0.26	39	10	1500	3.17609		Bi11-1	0.809668
Ah32-1	0.27	2	1	7.40741	0.869666		Bi11-2	1.28679
Ah32-2	0.25	7	1	28	1.44716		Bi11-3	1.20761	0.953214	0.093552	1.94435e-10
Ah32-3	0.27	3	1	11.1111	1.04576		M33-1	3.94885
Al39-1	0.2	2	1	10	1		M33-2	2.72612
Al39-2	0.22	26	1	118.182	2.07255		M33-3	3.11948
Al39-3	0.21	26	1	123.81	2.09275		M33-1	4.60206
Aw18-1	0.28	20	1000	71428.6	4.85387		M33-2	5.1347
Aw18-2	0.29	11	1000	37931	4.57899		M33-3	4.82391	4.05919	0.39617	0.00105987
Aw18-3	0.27	13	1000	48148.1	4.68258		R23-1	1.64782
Bi11-1	0.31	2	1	6.45161	0.809668		R23-2	0.19382
Bi11-2	0.31	6	1	19.3548	1.28679		R23-3	1.43111
Bi11-3	0.31	5	1	16.129	1.20761		R23-1	2.12057
Br13-1	0.26	70	100	26923.1	4.43012		R23-2	3.59251
Br13-2	0.27	26	1000	96296.3	4.98361		R23-3	3.17609	2.02699	0.504626	2.07918e-05
Br13-3	0.25	15	100	6000	3.77815		Br13-1	3.79909
Bw35-1	0.27	2	10	74.0741	1.86967		Br13-2	4.47173
Bw35-2	0.27	5	100	1851.85	3.26761		Br13-3	4.67585
Bw35-3	0.26	23	1000	88461.5	4.94675		Br13-1	4.43012
Psa3-1	0.51	35	10000	686275	5.8365		Br13-2	4.98361
Psa3-2	0.5	183	10000	3660000	6.56348		Br13-3	3.77815	4.35642	0.196566	8.31891e-05
Psa3-3	0.5	174	10000	3480000	6.54158		Bw35-1	2.26324
Ad35-1	0.23	22	100	9565.22	3.98069		Bw35-2	0.823909
Ad35-2	0.23	10	100	4347.83	3.63827		Bw35-3	2.31527
Ad35-3	0.23	2.6	100	1130.43	3.05325		Bw35-1	1.86967
Ad35-4	0.22	17	100	7727.27	3.88803		Bw35-2	3.26761
Ad35-5	0.21	16	100	7619.05	3.8819		Bw35-3	4.94675	2.58107	0.572514	0.000182627
Ad35-6	0.22	49	100	22272.7	4.34777
0 time
D35-1	0.19	2	1	10.5263	1.02228
D35-2	0.2	4	1	20	1.30103
D35-3	0.21	1	1	4.7619	0.677781	1.00036	0.18025
J40-1	0.19	1	1	5.26316	0.721246
J40-2	0.18	1	1	5.55556	0.744727
J40-3	0.18	5	1	27.7778	1.4437	1.00036	0.237
M33-1	0.18	1	1	5.55556	0.744727
M33-2	0.19	2	1	10.5263	1.02228
M33-3	0.19	2	1	10.5263	1.02228	0.96989	0.0925163
R23-1	0.12	1	1	8.33333	0.920819
R23-2	0.11	1	1	9.09091	0.958607
R23-3	0.11	2	1	18.1818	1.25964	0.92976	0.107198
Ad35-1	0.3	7	1	23.3333	1.36798
Ad35-2	0.3	2	1	6.66667	0.823909
Ad35-3	0.3	7	1	23.3333	1.36798	1.04635	0.181356
Ah32-1	0.19	3	1	15.7895	1.19837
Ah32-2	0.2	2	1	10	1
Ah32-3	0.19	1	1	5.26316	0.721246	1.18662	0.138383
Al39-1	0.18	1	1	5.55556	0.744727
Al39-2	0.18	1	1	5.55556	0.744727
Al39-3	0.18	2	1	11.1111	1.04576	0.973205	0.100343
Aw18-1	0.11	3	1	27.2727	1.43573
Aw18-2	0.1	3	1	30	1.47712
Aw18-3	0.09	1	1	11.1111	1.04576	0.845071	0.13741
Bi11-1	0.16	2	1	12.5	1.09691
Bi11-2	0.17	4	1	23.5294	1.37161
Bi11-3	0.16	1	1	6.25	0.79588	1.31954	0.166257
Br13-1	0.13	2	1	15.3846	1.18709
Br13-2	0.13	4	1	30.7692	1.48812
Br13-3	0.13	1	1	7.69231	0.886057	1.08813	0.1738
Bw35-1	0.15	4	1	26.6667	1.42597
Bw35-2	0.13	1	1	7.69231	0.886057
Bw35-3	0.15	1	1	6.66667	0.823909	1.18709	0.191172
Psa3-1	0.1	10	1	100	2
Psa3-2	0.09	9	1	100	2
Psa3-3	0.09	23	1	255.556	2.40749	1.04531	0.135828

## Sheet: Fig2F
	Area(cm2)	Colony(0=200x)	dillution	CFU	CFU/cm2	Log(CFU/cm2)				Log(CFU/cm2)	Average	SE	t-test
D35-1	1.5386	8	200	1600	1039.91	3.01699			Psa-1	6.59103				Psa3	7.1545	0.184296
D35-2	1.5386	17	200	3400	2209.8	3.34435			Psa-2	7.82991				TD35	2.80283	0.222253
D35-3	1.5386	1	200	200	129.988	2.1139	2.82508	0.367933	Psa-3	7.22785				TJ40	2.56431	0.213657
J40-1	1.5386	4	200	800	519.953	2.71596			Psa-1	7.19309				TAd35	6.2877	0.264728
J40-2	1.5386	14	200	2800	1819.84	3.26003			Psa-2	7.36918				TAh32	4.81782	0.35457
J40-3	1.5386	9	200	1800	1169.89	3.06815	3.01471	0.159315	Psa-3	6.71596	7.1545	0.184296		TAl39	3.78935	0.359851
R23-1	1.5386	22	20000	440000	285974	5.45633			D35-1	3.01699				TAw18	5.17524	0.396327
R23-2	1.5386	15	20000	300000	194982	5.29			D35-2	3.34435				TBill	3.31254	0.297415
R23-3	1.5386	15	20000	300000	194982	5.29			D35-3	2.1139				TM33	5.90232	0.339691
R23-4	1.5386	17	20000	340000	220980	5.34435	5.34517	0.0392056	D35-1	3.1139				TR23	5.60083	0.249515
R23-5	1.5386	5	200	1000	649.942	2.81287			D35-2	3.1139				TBr13	5.4765	0.377689
Ah32-1	1.5386	5	2000	10000	6499.42	3.81287			D35-3	2.1139	2.80283	0.222253	3.33874e-08	TBw35	4.98007	0.124851
Ah32-2	1.5386	30	2000	60000	38996.5	4.59103			J40-1	2.71596
Ah32-3	1.5386	5	2000	10000	6499.42	3.81287	4.07226	0.259384	J40-2	3.26003
Al39-1	1.5386	32	200	6400	4159.63	3.61905			J40-3	3.06815
Al39-2	1.5386	8	200	1600	1039.91	3.01699			J40-1	2.1139
Al39-3	1.5386	5	200	1000	649.942	2.81287	3.14964	0.24199	J40-2	2.1139
Aw18-1	1.5386	64	20000	1280000	831925	5.92008			J40-3	2.1139	2.56431	0.213657	1.59919e-08
Aw18-2	1.5386	20	20000	400000	259977	5.41493			Ad35-1	6.26003
Aw18-3	1.5386	3	20000	60000	38996.5	4.59103	5.30868	0.387327	Ad35-2	6.82147
Bi11-1	1.5386	40	200	8000	5199.53	3.71596			Ad35-3	6.59103
Bi11-2	1.5386	54	200	10800	7019.37	3.8463			Ad35-4	6.47563
Bi11-3	1.5386	60	200	12000	7799.3	3.89206	3.81811	0.0527514	Ad35-5	6.56106
Br13-1	1.5386	51	2000	102000	66294	4.82147			Ad35-6	5.01699	6.2877	0.264728	0.0228077
Br13-2	1.5386	55	2000	110000	71493.6	4.85427			Ah32-1	3.81287
Br13-3	1.5386	24	2000	48000	31197.2	4.49412			Ah32-2	4.59103
Br13-4	1.5386	77	2000	154000	100091	5.00039	4.79256	0.106813	Ah32-3	3.81287
Bw35-1	1.5386	23	20000	460000	298973	5.47563			Ah32-1	5.52888
Bw35-2	1.5386	7	20000	140000	90991.8	4.959			Ah32-2	5.45633
Bw35-3	1.5386	4.6	20000	92000	59794.6	4.77666			Ah32-3	5.70497	4.81782	0.35457	0.000162167
Bw35-4	1.5386	8	20000	160000	103991	5.01699	4.91755	0.0724072	Al39-1	3.61905
Bw35-5	1.5386	0.2	20000	4000	2599.77	3.41493			Al39-2	3.01699
									Al39-3	2.81287
D35-1	1.5386	1	2000	2000	1299.88	3.1139			Al39-1	4.73715
D35-2	1.5386	1	2000	2000	1299.88	3.1139			Al39-2	3.59103
D35-3	1.5386	1	200	200	129.988	2.1139	2.78057	0.333333	Al39-3	4.959	3.78935	0.359851	8.30773e-06
J40-1	1.5386	1	200	200	129.988	2.1139			Aw18-1	5.92008
J40-2	1.5386	1	200	200	129.988	2.1139			Aw18-2	5.41493
J40-3	1.5386	1	200	200	129.988	2.1139	2.1139	0	Aw18-3	4.59103
R23-1	1.5386	8	200000	1600000	1.03991e+06	6.01699			Aw18-1	6.63242
R23-2	1.5386	31	200000	6200000	4.02964e+06	6.60527			Aw18-2	5.36918
R23-3	1.5386	25	200000	5000000	3.24971e+06	6.51184			Aw18-3	6.74737	5.17524	0.396327	0.00497499
R23-4	1.5386	6	20000	120000	77993	4.89206	6.00654	0.351757	Bi11-1	3.71596
R23-5	1.5386	7	20000	140000	90991.8	4.959			Bi11-2	3.8463
Ah32-1	1.5386	26	20000	520000	337970	5.52888			Bi11-3	3.89206
Ah32-2	1.5386	22	20000	440000	285974	5.45633			Bi11-1	2.1139
Ah32-3	1.5386	39	20000	780000	506954	5.70497	5.56339	0.0738221	Bi11-2	3.59103
Al39-1	1.5386	42	2000	84000	54595.1	4.73715			Bi11-3	2.71596	3.31254	0.297415	6.70139e-07
Al39-2	1.5386	3	2000	6000	3899.65	3.59103			R23-1	5.45633
Al39-3	1.5386	70	2000	140000	90991.8	4.959	4.42906	0.423883	R23-2	5.29
Aw18-1	1.5386	33	200000	6600000	4.28961e+06	6.63242			R23-4	5.34435
Aw18-2	1.5386	18	20000	360000	233979	5.36918			R23-1	6.01699
Aw18-3	1.5386	43	200000	8600000	5.5895e+06	6.74737			R23-2	6.60527
Aw18-4	1.5386	160	2000	320000	207981	5.31802			R23-4	4.89206	5.60083	0.249515	0.000530531
Aw18-5	1.5386	23	20000	460000	298973	5.47563	5.72755	0.305466	M33-1	7.12674
Bi11-1	1.5386	1	200	200	129.988	2.1139			M33-2	6.5763
Bi11-2	1.5386	30	200	6000	3899.65	3.59103			M33-3	5.41493
Bi11-3	1.5386	4	200	800	519.953	2.71596	2.80696	0.428829	M33-4	6.06815
Br13-1	1.5386	6	200000	1200000	779930	5.89206			M33-5	5.1139
Br13-2	1.5386	40	200000	8000000	5.19953e+06	6.71596			M33-6	5.1139	5.90232	0.339691	0.00886812
Br13-3	1.5386	10	200000	2000000	1.29988e+06	6.1139			Br13-1	4.82147
Br13-4	1.5386	3	200000	600000	389965	5.59103	6.07824	0.238049	Br13-2	4.82147
Bw35-1	1.5386	92	2000	184000	119589	5.07769			Br13-3	4.49412
Bw35-2	1.5386	21	2000	42000	27297.5	4.43612			Br13-1	5.89206
Bw35-3	1.5386	110	2000	220000	142987	5.1553			Br13-2	6.71596
Bw35-4	1.5386	8	2000	16000	10399.1	4.01699	4.67153	0.271237	Br13-3	6.1139	5.4765	0.377689	0.00205112
Psa3-1	1.5386	3	2000000	6000000	3.89965e+06	6.59103			Bw35-1	5.47563
Psa3-2	1.5386	52	2000000	104000000	6.75939e+07	7.82991			Bw35-2	4.959
Psa3-3	1.5386	13	2000000	26000000	1.68985e+07	7.22785	7.21626	0.357681	Bw35-3	4.77666
M33-1	1.5386	103	200000	20600000	1.33888e+07	7.12674			Bw35-1	5.07769
M33-2	1.5386	29	200000	5800000	3.76966e+06	6.5763			Bw35-2	4.43612
M33-3	1.5386	2	200000	400000	259977	5.41493			Bw35-3	5.1553	4.98007	0.124851	3.09936e-06
M33-4	1.5386	9	200000	1800000	1.16989e+06	6.06815
M33-5	1.5386	1	200000	200000	129988	5.1139
M33-6	1.5386	1	200000	200000	129988	5.1139	5.90232	0.339691
Ad35-1	1.5386	14	200000	2800000	1.81984e+06	6.26003
Ad35-2	1.5386	51	200000	10200000	6.6294e+06	6.82147
Ad35-3	1.5386	30	200000	6000000	3.89965e+06	6.59103
Ad35-4	1.5386	23	200000	4600000	2.98973e+06	6.47563
Ad35-5	1.5386	28	200000	5600000	3.63967e+06	6.56106
Ad35-6	1.5386	8	20000	160000	103991	5.01699	6.2877	0.264728
Psa3-1	1.5386	12	2000000	24000000	1.55986e+07	7.19309
Psa3-2	1.5386	18	2000000	36000000	2.33979e+07	7.36918
Psa3-3	1.5386	4	2000000	8000000	5.19953e+06	6.71596	7.09274	0.195127

## Sheet: Fig3B
	Weight	Colony (3)	Log(CFU/mg)	Average	SE	t-test
P315-1	0.39	300	5.88606						0 time		7dpi
P315-2	0.32	360	6.05115					Psa1	4.12572	0.0784717	5.24777	0.130949
P315-3	0.31	140	5.65477					Psa1-hopR1	4.19217	0.0337266	4.30241	0.150303
P315-4	0.24	300	6.09691
P315-5	0.34	600	6.24667
P315-6	0.32	800	6.39794	6.05558	0.151623			Psa3	3.80505	0.0867672	5.85244	0.0880344
P315h-1	0.27	0.3	3.04576					Psa3-hopR1	3.7626	0.0919996	4.32202	0.0924034
P315h-2	0.35	0.11	2.49732
P315h-3	0.29	0.17	2.76805
P315h-4	0.53	4	3.87778					Psa5	3.49391	0.157678	5.30896	0.0749564
P315h-5	0.53	40	4.87778					Psa5-hopR1	3.39088	0.0397557	2.65362	0.160203
P315h-6	0.4	11	4.43933	3.58434	0.158323	0.00012042
P1-1	0.52	45	4.93721
P1-2	0.49	80	5.21289					Psa6	3.62919	0.103226	4.98062	0.212963
P1-3	0.52	230	5.64572					Psa6-hopR1	3.65839	0.0945718	2.70012	0.1606
P1-4	0.39	30	4.88606
P1-5	0.37	59	5.20265
P1-6	0.35	140	5.60206	5.24777	0.130949			Psa3-15	4.02749	0.0585591	6.05558	0.151623
P1h-1	0.51	39	4.88349					Psa3-15-hopR1	3.57148	0.120871	3.58434	0.158323
P1h-2	0.48	7.7	4.20525
P1h-3	0.49	6	4.08796
P1h-4	0.45	18	4.60206
P1h-5	0.49	3.8	3.88959
P1h-6	0.4	5.6	4.14613	4.30241	0.150303	0.000789364
P3-1	0.31	100	5.50864
P3-2	0.29	200	5.83863
P3-3	0.42	230	5.73848
P3-4	0.2	200	6
P3-5	0.24	190	5.89854
P3-6	0.2	270	6.13033	5.85244	0.0880344
P3h-1	0.22	5.7	4.41345
P3h-2	0.32	4.3	4.12832
P3h-3	0.3	6.3	4.32222
P3h-1	0.37	13	4.54574
P3h-2	0.29	2.8	3.98476
P3h-3	0.29	10	4.5376	4.32202	0.0924034	2.94107e-07
P5-1	0.28	50	5.25181
P5-2	0.2	60	5.47712
P5-3	0.3	90	5.47712
P5-1	0.34	80	5.37161
P5-2	0.31	30	4.98576
P5-3	0.41	80	5.29031	5.30896	0.0749564
P5h-1	0.37	0.56	3.17999
P5h-2	0.34	0.16	2.67264
P5h-3	0.34	0.12	2.5477
P5h-1	0.39	0.39	3
P5h-2	0.34	0.09	2.42276
P5h-3	0.51	0.064	2.09861	2.65362	0.160203	3.46773e-08
P6-1	0.27	57	5.32451
P6-2	0.31	80	5.41173
P6-3	0.28	50	5.25181
P6-1	0.45	37	4.91499
P6-2	0.41	40	4.98928
P6-3	0.51	5	3.9914	4.98062	0.212963
P6h-1	0.38	0.16	2.62434
P6h-2	0.26	0.38	3.16481
P6h-3	0.31	0.15	2.68473
P6h-1	0.44	0.19	2.6353
P6h-2	0.36	0.4	3.04576
P6h-3	0.45	0.05	2.04576	2.70012	0.1606	6.54818e-06
0time
P1-1	0.33	31	3.97285
P1-2	0.31	53	4.23291
P1-3	0.31	46	4.1714	4.12572	0.0784717
P1h-1	0.36	49	4.13389
P1h-2	0.32	57	4.25072
P1h-3	0.36	56	4.19189	4.19217	0.0337266
P3-1	0.29	22	3.88002
P3-2	0.25	20	3.90309
P3-3	0.35	15	3.63202	3.80505	0.0867672
P3h-1	0.27	22	3.91106
P3h-2	0.28	11	3.59423
P3h-3	0.33	20	3.78252	3.7626	0.0919996
P5-1	0.24	4	3.22185
P5-2	0.29	17	3.76805
P5-3	0.29	9	3.49184	3.49391	0.157678
P5h-1	0.32	8	3.39794
P5h-2	0.24	5	3.31876
P5h-3	0.28	8	3.45593	3.39088	0.0397557
P6-1	0.25	11	3.64345
P6-2	0.18	5	3.4437
P6-3	0.19	12	3.80043	3.62919	0.103226
P6h-1	0.32	17	3.7253
P6h-2	0.27	8	3.47173
P6h-3	0.3	18	3.77815	3.65839	0.0945718
P315-1	0.21	18	3.93305
P315-2	0.29	30	4.01472
P315-3	0.22	30	4.1347	4.02749	0.0585591
P315h-1	0.3	13	3.63682
P315h-2	0.2	11	3.74036
P315h-3	0.23	5	3.33724	3.57148	0.120871

## Sheet: Fig3D
	Weight	Colony(3)	Log(CFU/mg)	Average	SE			Log(CFU/mg)	Average	SE	t-test
P1-1	0.41	1050	6.40841				Psa1	5.89237							Psa1	5.61037	0.1427
P1-2	0.41	320	5.89237					5.08432							Psa1-hopR1	3.33891	0.204131
P1-3	0.42	51	5.08432	5.79503	0.385316			5.82193							Psa3	5.43464	0.356499
P1h-1	0.45	0.3	2.82391					5.68014							Psa3-hopR1	4.00095	0.219
P1h-2	0.42	1	3.37675					5.5731	5.61037	0.1427					Psa5	4.97003	0.465937
P1h-3	0.41	0.9	3.34146	3.18071	0.178689										Psa5-hopR1	2.42392	0.183956
P3-1	0.5	840	6.22531				Psa1-hopR1	2.82391							Psa6	4.10895	0.347859
P3-2	0.49	300	5.78693					3.37675							Psa6-hopR1	1.30135	0.231721
P3-3	0.5	290	5.76343	5.92522	0.150197			3.34146							Psa3-15	5.48001	0.309429
P3h-1	0.45	2	3.64782					4.05271							Psa3-15-hopR1	2.3206	0.846065
P3h-2	0.45	1.7	3.57724	3.61253	0.0352905			3.0997	3.33891	0.204131	1.68098e-05
P5-1	0.43	1	3.36653				Psa3	6.22531
P5-2	0.44	3	3.83367					5.78693
P5-3	0.44	3	3.83367	3.67796	0.155712			5.76343								0 time		7 dpi
P5h-1	0.43	0.1	2.36653					5.24715							Psa1	1.9677	0.0401824	5.61037	0.1427
P5h-2	0.43	0.6	3.14468					4.15039	5.43464	0.356499					Psa1-hopR1	1.91739	0.374964	3.33891	0.204131
P5h-3	0.43	0.06	2.14468	2.55197	0.303199										Psa3	1.54359	0.339275	5.43464	0.356499
P6-1	0.46	2	3.63827				Psa3-hopR1	3.64782							Psa3-hopR1	1.10505	0.165698	4.00095	0.219
P6-2	0.47	2	3.62893					3.57724							Psa5	1.14524	0.166369	4.97003	0.465937
P6-3	0.46	130	5.45119	4.23946	0.605867			4.80967							Psa5-hopR1	2.0587	0.181309	2.42392	0.183956
P6h-1	0.33	0.001	0.481486					3.97004							Psa6	2.77407	0.238749	4.10895	0.347859
P6h-2	0.34	0.029	1.93092					4	4.00095	0.219	0.00899904				Psa6-hopR1	1.73063	0.128218	1.30135	0.231721
P6h-3	0.34	0.021	1.79074	1.40105	0.461559		Psa5								Psa3-15	1.44325	0.238994	5.48001	0.309429
Psa3-1	0.29	3.8	5.11739					3.83367							Psa3-15-hopR1	2.15288	0.152879	2.3206	0.846065
Psa3-2	0.3	70	6.36798					3.83367
Psa3-3	0.32	160	6.69897	6.06144	0.481603			5.81707
P315h-1	0.45	0.002	0.647817					5.79588
P315h-2	0.64	0.001	0.19382					5.56988	4.97003	0.465937
P315h-3	0.63	0.0017	0.431108	0.424249	0.131103		Psa5-hopR1	2.36653
								3.14468
P1-1	0.33	219	5.82193					2.14468
P1-2	0.33	158	5.68014					2.26531
P1-3	0.31	116	5.5731	5.69172	0.0720651			2.19837	2.42392	0.183956	0.000949936
P1h-1	0.31	0.002	0.809668
P1h-2	0.31	3.5	4.05271				Psa6
P1h-3	0.31	0.39	3.0997	2.65403	0.96234			3.62893
P3-1	0.3	53	5.24715					5.45119
P3-2	0.29	4.1	4.15039					4.09691
P3-3	0.31	45	5.16185	4.85313	0.352234			3.56864
P3h-1	0.31	20	4.80967					3.79909	4.10895	0.347859
P3h-2	0.3	2.8	3.97004				Psa6-hopR1
P3h-3	0.31	3.1	4	4.2599	0.275019			1.93092
P5-1	0.32	210	5.81707					1.79074
P5-2	0.32	200	5.79588					0.869666
P5-3	0.35	130	5.56988	5.72761	0.0791033			0.869666
P5h-1	0.36	0.002	0.744727					1.04576	1.30135	0.231721	0.000150024
P5h-2	0.38	0.07	2.26531				Psa3-15
P5h-3	0.38	0.06	2.19837	1.73614	0.496081			5.11739
P6-1	0.24	3	4.09691					6.69897
P6-2	0.27	1	3.56864					5.11197
P6-3	0.27	1.7	3.79909	3.82154	0.152912			5.38233
P6h-1	0.27	0.002	0.869666					5.0894	5.48001	0.309429
P6h-2	0.27	0.002	0.869666				Psa3-15-hopR1	0.647817
P6h-3	0.27	0.003	1.04576	0.928363	0.0586971			0.431108
P315-1	0.34	44	5.11197					3.19749
P315-2	0.34	82	5.38233					2.32658
P315-3	0.35	43	5.0894	5.19457	0.0941085			5	2.3206	0.846065	0.000810715
P315h-1	0.33	0.52	3.19749
P315h-2	0.33	33	5
P315h-3	0.33	0.07	2.32658	3.50802	0.787213
0 time
P1-1	0.1	11	2.04139
P1-2	0.1	8	1.90309
P1-3	0.11	10	1.95861	1.9677	0.0401824
P1h-1	0.13	3	1.36318
P1h-2	0.14	60	2.63202
P1h-3	0.14	8	1.75696	1.91739	0.374964
P3-1	0.12	20	2.22185
P3-2	0.12	2	1.22185
P3-3	0.13	2	1.18709	1.54359	0.339275
P3h-1	0.12	1	0.920819
P3h-2	0.11	3	1.43573
P3h-3	0.11	1	0.958607	1.10505	0.165698
P5-1	0.1	3	1.47712
P5-2	0.1	1	1
P5-3	0.11	1	0.958607	1.14524	0.166369
P5h-1	0.08	20	2.39794
P5h-2	0.1	6	1.77815
P5h-3	0.09	9	2	2.0587	0.181309
P6-1	0.1	90	2.95424
P6-2	0.06	12	2.30103
P6-3	0.06	70	3.06695	2.77407	0.238749
P6h-1	0.09	7	1.89086
P6h-2	0.09	6	1.82391
P6h-3	0.1	3	1.47712	1.73063	0.128218
P315-1	0.12	2	1.22185
P315-2	0.12	10	1.92082
P315-3	0.13	2	1.18709	1.44325	0.238994
P315h-1	0.1	10	2
P315h-2	0.09	9	2
P315h-3	0.08	23	2.45864	2.15288	0.152879

## Sheet: Fig3F
44280	Area(cm2)	Colony(0=200x)	dillution	CFU	CFU/cm2	Log(CFU/cm2)					Log(CFU/cm2)	Average	SE		Log(CFU/cm2)	Average	SE		Log(CFU/cm2)	Average	SE		Log(CFU/cm2)	Average	SE		Log(CFU/cm2)	Average	SE
Psa1-1	1.5386	17	2000000	34000000	2.2098e+07	7.34435				Psa1-1	7.34435			Psa3-07-1	8.1139			Psa3-15-1	7.1553			Psa5-1	8.11823			Psa6-1	6.1553
Psa1-2	1.5386	11	2000000	22000000	1.42987e+07	7.1553				Psa1-2	7.1553			Psa3-07-2	7.99472			Psa3-15-2	8.06815			Psa5-2	7.77666			Psa6-2	5.1139
Psa1-3	1.5386	16	2000000	32000000	2.07981e+07	7.31802	7.27256	0.0591212		Psa1-3	7.31802			Psa3-07-3	7.31802			Psa3-15-3	7.81287			Psa5-3	7.41493			Psa6-3	6.1139
Psa3-07-1	1.5386	100	2000000	200000000	1.29988e+08	8.1139				Psa1-4	7.01699			Psa3-07-4	8.1139			Psa3-15-4	7.26003			Psa5-4	6.959			Psa6-4	7.1553
Psa3-07-2	1.5386	76	2000000	152000000	9.87911e+07	7.99472				Psa1-5	6.81287			Psa3-07-5	8.06815			Psa3-15-5	6.89206			Psa5-5	7.01699			Psa6-5	7.1553
Psa3-07-3	1.5386	16	2000000	32000000	2.07981e+07	7.31802	7.80888	0.247829		Psa1-6	7.92008	7.26127	0.154501	Psa3-07-6	7.01699	7.77095	0.195553	Psa3-15-6	6.59103	7.29657	0.226908	Psa5-6	6.959	7.37414	0.19913	Psa6-6	7.06815	6.33874	0.348685
Psa3-15-1	1.5386	11	2000000	22000000	1.42987e+07	7.1553				Psa1-hopR1-1	4.81287			Psa307-hopR-1	6.36918			Psa315-hopR-1	5.01699			Psa5-hopR-1	3.59103			Psa6-hopR-1	4.68211
Psa3-15-2	1.5386	90	2000000	180000000	1.16989e+08	8.06815				Psa1-hopR1-2	5.72669			Psa307-hopR-2	6.45633			Psa315-hopR-2	5.01699			Psa5-hopR-2	4.01699			Psa6-hopR-2	4.41493
Psa3-15-3	1.5386	50	2000000	100000000	6.49942e+07	7.81287	7.67877	0.271914		Psa1-hopR1-3	5.56106			Psa307-hopR-3	6.71596			Psa315-hopR-3	5.89206			Psa5-hopR-3	3.81287			Psa6-hopR-3	3.41493
Psa5-1	1.5386	101	2000000	202000000	1.31288e+08	8.11823				Psa1-hopR1-4	4.63242			Psa307-hopR-4	5.59103			Psa315-hopR-4	5.29			Psa5-hopR-4	4.1139			Psa6-hopR-4	4.89206
Psa5-2	1.5386	46	2000000	92000000	5.97946e+07	7.77666				Psa1-hopR1-5	4.92682			Psa307-hopR-5	6.77666			Psa315-hopR-5	6.51184			Psa5-hopR-5	4.1139			Psa6-hopR-5	5.29
Psa5-3	1.5386	20	2000000	40000000	2.59977e+07	7.41493	7.76994	0.203051		Psa1-hopR1-6	5.08239	5.12371	0.176382	Psa307-hopR-6	5.82991	6.28984	0.195999	Psa315-hopR-6	4.959	5.44781	0.255901	Psa5-hopR-6	3.89206	3.92346	0.082667	Psa6-hopR-6	4.81287	4.58448	0.261447
Psa6-1	1.5386	11	200000	2200000	1.42987e+06	6.1553
Psa6-2	1.5386	1	200000	200000	129988	5.1139
Psa6-3	1.5386	10	200000	2000000	1.29988e+06	6.1139	5.79437	0.340442
Psa1-hopR1-1	1.5386	28	20000	560000	363967	5.56106							t-test				t-test				t-test				t-test				t-test
Psa1-hopR1-2	1.5386	5	20000	100000	64994.2	4.81287				Psa1	7.26127	0.154501		Psa3-07	7.77095	0.195553		Psa3-15	7.29657	0.226908		Psa5	7.37414	0.19913		Psa6	6.33874	0.348685
Psa1-hopR1-3	1.5386	41	20000	820000	532952	5.72669	5.36687	0.281096		Psa1-hopR1	5.12371	0.176382	3.6869e-06	Psa3-07-hopR1	6.28984	0.195999	0.000323844	Psa3-15-hopR1	5.44781	0.255901	0.000299072	Psa5-hopR1	3.92346	0.082667	1.87261e-08	Psa6-hopR1	4.58448	0.261447	0.00362448
Psa307-hopR1-1	1.5386	18	200000	3600000	2.33979e+06	6.36918
Psa307-hopR1-2	1.5386	22	200000	4400000	2.85974e+06	6.45633
Psa307-hopR1-3	1.5386	40	200000	8000000	5.19953e+06	6.71596	6.51382	0.104155
Psa315-hopR1-1	1.5386	8	20000	160000	103991	5.01699
Psa315-hopR1-2	1.5386	8	20000	160000	103991	5.01699
Psa315-hopR1-3	1.5386	60	20000	1200000	779930	5.89206	5.30868	0.291687
Psa5-hopR1-1	1.5386	3	2000	6000	3899.65	3.59103
Psa5-hopR1-2	1.5386	8	2000	16000	10399.1	4.01699
Psa5-hopR1-3	1.5386	5	2000	10000	6499.42	3.81287	3.80696	0.123002
Psa6-hopR1-1	1.5386	37	2000	74000	48095.7	4.68211
Psa6-hopR1-2	1.5386	20	2000	40000	25997.7	4.41493
Psa6-hopR1-3	1.5386	2	2000	4000	2599.77	3.41493	4.17066	0.385653
44267
Psa3-15-1	1.5386	14	2000000	28000000	1.81984e+07	7.26003
Psa3-15-2	1.5386	6	2000000	12000000	7.7993e+06	6.89206
Psa3-15-3	1.5386	3	2000000	6000000	3.89965e+06	6.59103	6.91437	0.193448
Psa5-1	1.5386	7	2000000	14000000	9.09918e+06	6.959
Psa5-2	1.5386	8	2000000	16000000	1.03991e+07	7.01699
Psa5-3	1.5386	7	2000000	14000000	9.09918e+06	6.959	6.97833	0.0193306
Psa6-1	1.5386	16	20000	320000	207981	5.31802
Psa6-2	1.5386	16	20000	320000	207981	5.31802
Psa6-3	1.5386	30	20000	600000	389965	5.59103	5.40902	0.0910004
Psa1-hopR1-1	1.5386	4	20000	80000	51995.3	4.71596
Psa1-hopR1-2	1.5386	2	20000	40000	25997.7	4.41493
Psa1-hopR1-3	1.5386	8	2000	16000	10399.1	4.01699	4.38263	0.202421
Psa315-hopR1-1	1.5386	1	20000	20000	12998.8	4.1139
Psa315-hopR1-2	1.5386	1	20000	20000	12998.8	4.1139
Psa315-hopR1-3	1.5386	5	20000	100000	64994.2	4.81287
Psa315-hopR1-4	1.5386	15	20000	300000	194982	5.29
Psa315-hopR1-5	1.5386	25	200000	5000000	3.24971e+06	6.51184
Psa315-hopR1-6	1.5386	7	20000	140000	90991.8	4.959	4.96692	0.363787
Psa5-hopR1-1	1.5386	10	2000	20000	12998.8	4.1139
Psa5-hopR1-2	1.5386	10	2000	20000	12998.8	4.1139
Psa5-hopR1-3	1.5386	6	2000	12000	7799.3	3.89206	4.03995	0.0739496
Psa6-hopR1-1	1.5386	6	2000	12000	7799.3	3.89206
Psa6-hopR1-2	1.5386	10	2000	20000	12998.8	4.1139
Psa6-hopR1-3	1.5386	6	2000	12000	7799.3	3.89206	3.96601	0.0739496
44291
Psa1-1	1.5386	8	2000000	16000000	1.03991e+07	7.01699
Psa1-2	1.5386	5	2000000	10000000	6.49942e+06	6.81287
Psa1-3	1.5386	64	2000000	128000000	8.31925e+07	7.92008	7.24998	0.340192
Psa3-07-1	1.5386	10	20000000	200000000	1.29988e+08	8.1139
Psa3-07-2	1.5386	9	20000000	180000000	1.16989e+08	8.06815
Psa3-07-3	1.5386	8	2000000	16000000	1.03991e+07	7.01699	7.73302	0.358254
Psa5-1	1.5386	54	2000000	108000000	7.01937e+07	7.8463
Psa5-2	1.5386	59	2000000	118000000	7.66931e+07	7.88476
Psa5-3	1.5386	34	2000000	68000000	4.4196e+07	7.64538	7.79215	0.0742164
Psa6-1	1.5386	11	2000000	22000000	1.42987e+07	7.1553
Psa6-2	1.5386	11	2000000	22000000	1.42987e+07	7.1553
Psa6-3	1.5386	9	2000000	18000000	1.16989e+07	7.06815	7.12625	0.0290501
Psa1-hopR1-1	1.5386	33	2000	66000	42896.1	4.63242
Psa1-hopR1-2	1.5386	65	2000	130000	84492.4	4.92682
Psa1-hopR1-3	1.5386	93	2000	186000	120889	5.08239	4.88054	0.13194
Psa307-hopR1-1	1.5386	30	20000	600000	389965	5.59103
Psa307-hopR1-2	1.5386	46	200000	9200000	5.97946e+06	6.77666
Psa307-hopR1-3	1.5386	52	20000	1040000	675939	5.82991	6.06587	0.362027
Psa5-hopR1-1	1.5386	3	20000	60000	38996.5	4.59103
Psa5-hopR1-2	1.5386	5	20000	100000	64994.2	4.81287
Psa5-hopR1-3	1.5386	2	20000	40000	25997.7	4.41493	4.60628	0.115128
Psa6-hopR1-1	1.5386	6	20000	120000	77993	4.89206
Psa6-hopR1-2	1.5386	15	20000	300000	194982	5.29
Psa6-hopR1-3	1.5386	5	20000	100000	64994.2	4.81287	4.99831	0.147624

## Sheet: Fig4ABC
Target Name	Sample Name	Ct(SDM)
Ref2	0time	25.83	25.6625	0.890384	0.974905
Ref2	0time	25.89		0.854114	1.04972
Ref2	0time	24.66		2.00347	1.41748
Ref2	0time	26.27		0.656333	0.689362
Ref2	4h	25.58		1.05885	1.39797
Ref2	4h	25.13		1.44643	1.90528
Ref2	4h	24.38		2.4326	2.32947
Ref2	4h	26.46		0.575345	1.17555
Ref2	24h	23.91		3.36942	3.24901
Ref2	24h	23.08		5.98977	5.02805
Ref2	24h	23.46		4.60276	4.22807
Ref2	24h	22.98		6.41967	5.54044
Ref2	48h	22.59		8.4123	11.6318
Ref2	48h	22.58		8.47081	13.2079
Ref2	48h	22.17		11.255	14.1232
Ref2	48h	22.23		10.7966	14.1559
Ref3	0time	27.08	27.295	1.1607
Ref3	0time	27.06		1.17691
Ref3	0time	27.27		1.01748
Ref3	0time	27.77		0.719467
Ref3	4h	26.91		1.30586
Ref3	4h	26.63		1.58557
Ref3	4h	26.6		1.61888
Ref3	4h	27.01		1.21841
Ref3	24h	25.41		3.69353
Ref3	24h	25.24		4.15544
Ref3	24h	25.48		3.5186
Ref3	24h	24.85		5.44526
Ref3	48h	23.29		16.0555
Ref3	48h	22.89		21.1854
Ref3	48h	23.25		16.5069
Ref3	48h	23.1		18.3156
Ref5	0time	26.61	26.4525	0.896577
Ref5	0time	26.25		1.15069
Ref5	0time	25.97		1.39716
Ref5	0time	26.98		0.693756
Ref5	4h	25.47		1.97589
Ref5	4h	24.86		3.01571
Ref5	4h	24.77		3.20984
Ref5	4h	25.24		2.31739
Ref5	24h	24.99		2.75586
Ref5	24h	24.1		5.10708
Ref5	24h	24.23		4.66701
Ref5	24h	24.17		4.8652
Ref5	48h	22.91		11.652
Ref5	48h	22.77		12.8393
Ref5	48h	22.53		15.1632
Ref5	48h	22.61		14.3452
										hopR1
hopR1	0time	32.03	31.935	0.936272	0.960373	1.02352	0.126311		0 time	1.02352	0.126311
hopR1	0time	31.44		1.40932	1.34257				4 h	48.6457	10.049
hopR1	0time	31.88		1.03886	0.732889				24 h	163.14	25.7555
hopR1	0time	32.39		0.72951	1.05824				48 h	107.056	10.242
hopR1	4h	26.16		54.7581	39.1697	48.6457	10.049
hopR1	4h	25.29		100.079	52.5275
hopR1	4h	24.49		174.248	74.8017
hopR1	4h	26.89		33.0139	28.0838
hopR1	24h	23.77		287.019	88.3403	163.14	25.7555
hopR1	24h	21.95		1013.41	201.551
hopR1	24h	22.27		811.811	192.005
hopR1	24h	22.05		945.543	170.662
hopR1	48h	22.07		932.526	80.1705	107.056	10.242
hopR1	48h	21.23		1669.27	126.384
hopR1	48h	21.22		1680.88	119.015
hopR1	48h	21.43		1453.18	102.655
										hrpA1
hrpA	0time	28.67	28.255	0.750019	0.769326	1.04149	0.168368		0 time	1.04149	0.168368
hrpA	0time	28.63		0.771105	0.734584				4 h	169.678	23.917
hrpA	0time	27.39		1.82134	1.28491				24 h	308.113	17.4876
hrpA	0time	28.33		0.949342	1.37713				48 h	262.49	19.5539
hrpA	4h	20.72		185.465	132.667	169.678	23.917
hrpA	4h	20.02		301.288	158.134
hrpA	4h	19.13		558.34	239.686
hrpA	4h	20.81		174.248	148.227
hrpA	24h	18.53		846.285	260.475	308.113	17.4876
hrpA	24h	17.58		1634.92	325.159
hrpA	24h	17.92		1291.65	305.494
hrpA	24h	17.37		1891.09	341.324
hrpA	48h	17		2443.95	210.11	262.49	19.5539
hrpA	48h	16.31		3942.79	298.516
hrpA	48h	16.28		4025.63	285.036
hrpA	48h	16.43		3628.1	256.296
										hrpA1
hrpL	0time	30.15	29.7025	0.733312	0.752189	1.02653	0.134027		0 time	1.02653	0.134027
hrpL	0time	29.39		1.24186	1.18304				4 h	43.6102	2.25305
hrpL	0time	29.43		1.2079	0.852143				24 h	75.7348	3.66181
hrpL	0time	29.84		0.909093	1.31875				48 h	83.1825	3.89902
hrpL	4h	23.94		54.2857	38.8318	43.6102	2.25305
hrpL	4h	23.41		78.3847	41.1409
hrpL	4h	22.87		113.969	48.925
hrpL	4h	23.96		53.5383	45.5433
hrpL	24h	21.98		211.205	65.006	75.7348	3.66181
hrpL	24h	21.1		388.696	77.3055
hrpL	24h	21.31		336.043	79.4789
hrpL	24h	20.89		449.601	81.1489
hrpL	48h	19.97		850.696	73.1355	83.1825	3.89902
hrpL	48h	19.54		1146.09	86.7725
hrpL	48h	19.37		1289.41	91.2973
hrpL	48h	19.53		1154.06	81.5248

## Sheet: Fig4D
	op		p1-1h	p1h-1h	Psa3-1h	R23-1h	p3-1h	p3h-1h	p5-1h	p5h-1h	p6-1h	p6h-1h	p1-4h	p1h-4h	Psa3-4h	R23-4h	p3-4h	p3h-4h	p5-4h	p5h-4h	p6-4h	p6h-4h
1	1.305		0.901	0.791	1.118	1.275	0.75	0.5	0.791	1.118	1.25	1	0.707	0.75	2.372	1.768	1.346	1.118	0.791	0.901	1	0.901
2	1.663		1.061	0	1.25	1.061	0.75	0.75	0.791	1.25	1.031	0.901	1.75	1.031	0.791	1.5	1.904	0.791	0.707	0.75	1.25	1.677
3	0.923		0.901	1.458	0.901	0.75	0.25	0.791	0.75	1.118	0.901	1.25	2.016	1.118	1.275	1	1.768	0.559	1.061	0.559	1.061	0.25
4	1.459		1	0.25	1.25	1.25	0.25	0.354	1.118	1.118	1.031	0.75	1.75	1.768	1.953	1.25	1.803	0	2.136	1	0.559	1.118
5	1.111		1.25	0.5	0.901	0.559	1.031	1.031	1.346	1.061	0.901	1.118	1.25	1.25	1.25	1.061	1.414	0	1.346	1.031	1.25	0.901
6	1.488		0.559	0.5	0.25	1.031	1.031	0.559	1.031	0.5	1.061	1.031	2	1.25	1.803	0.75	1.118	0.25	1	0.791	1.458	0.791
7	1.203		1.25	1.031	1.118	1.346	0	0.75	0.791	1.061	0.5	0.25	1.768	1.414	1.677	1.581	1.118	1.25	2.305	0.5	1.414	0.901
8	1.502		1.346	0.559	1.414	1.275	0.707	0.25	1.677	0.75	0.5	0.901	1.677	1.118	1.061	1.25	1.458	0.25	1.677	0.75	1.346	1.061
9	1.203		0.791	1	0.5	4.123	0.791	0.354	1.521	1.118	0.75	1.601	1.061	0.559	1.581	1.25	1.275	0.25	0.559	1.061	1.346	1.521
10	1.459		1.061	1	0.901	1	0.25	1.061	0.354	0.707	1.118	0.791	1.5	1.118	1.5	1.346	1.803	1.25	1.275	1.458	1.118	1.118
11	1.111		0.559	1.521	0.559	4.472	0	0.559	0.75	0.25	0.75	0.395	0.901	1.031	1.601	0.707	1.458	1.601	1.118	0.559	1.25	1.275
12	1.459		0.75	1	0.791	1.031	0.901	0.75	0.75	0.5	0.75	0.791	1.521	1.25	2.658	1	1.803	1.904	1.118	0.75	1.031	0.707
13	1.032		0.791	0.791	0.901	1.25	0.354	1.118	0.559	0.901	1.25	0.75	1.061	0.5	2.136	0.5	1.458	0.707	1.581	1.521	1.803	0.791
14	2.063		0.354	1.118	1.803	0.791	0.75	1.118	1	0.901	1.031	0.791	1.346	1.346	1.118	1.118	1.5	0.559	1.25	0.707	0.75	0.75
15	1.701		0.707	0.901	1.581	0	1.118	1.031	0.559	0.5	0.559	1.031	1.25	1.5	1.275	2.136	1.031	1.414	1.275	1.061	1.458	1.031
16	1.502		0.5	1.25	1.275	1.118	1.031	1.031	0.5	1.061	0.707	1.031	1.25	1.118	2.136	1	1.904	1.25	0.559	0.901	1.414	1.25
17	1.571		0.75	0.75	0.901	0.901	0.559	0.791	0.707	0.707	0.75	1.061	1.346	0.559	1.953	0.354	0.901	1.346	1.75	0.5	1.521	1.061
18	0.292		1	0.901	0.901	0.75	0.75	0.354	0.559	1.953	1.118	0.707	0.901	1.275	2.358	1.118	1.904	1.5	0.791	1.061	1.82	0.901
19	1.488		0.75	1.275	1.25	1.581	0.559	1.031	1.25	0.75	0.559	0.707	1.521	1.346	1.953	1.061	1.414	0.901	0.901	0.901	1.25	0.559
20	1.321		1.118	0.75	1.118	0.354	0.75	0.75	1.118	0.901	1.25	0.559	1.803	1.061	0.707	1.25	1	0.559	1.25	1.031	1	1.601
21	1.111		0.559	0.901	1.25	1.061	1.118	0.559	0.5	1.031	0.791	0.707	1.25	0.707	2.25	1	1.458	0.791	2	1.25	1.118	1.25
22	2.493		1.275	0.791	1.118	0.901	1.25	0.5	2.016	1.601	0.707	1.25	1.275	1.275	2	1.25	1.118	0.791	0.791	1	1.803	1.061
23	0.825		0.25	1.25	0.5	0.75	0.5	0.75	1.581	1.118	0.791	0.75	1.458	0.75	1	0.791	1.953	0.791	0.707	0.25	2.236	1.275
24	1.255		1.031	0.75	1.061	0.901	0.354	0.791	0.791	1.118	0.901	1.118	0.5	0.354	1.953	1.25	1	0.791	1.118	1.275	0.791	0.901
25	1.321		0.901	0.791	0.75	1.25	1.031	1.25	1.118	1.25	1.031	0.559	1.521	0.707	2.136	1.25	1.118	0.75	1.521	0	1.275	0.791
26	1.321		0.791	0.791	1.061	0.559	0.354	0.901	0.791	0.791	0.901	0.75	1.5	0.791	1.904	0.75	3.041	0.791	0.791	0.354	2.062	1.25
27	1.032		1.118	0.791	0.559	0	0.354	0.791	1.25	1.118	0.559	0.901	1.581	1.118	2.236	1.458	2.136	0	0.707	1.031	1.414	0.559
28	1.032		0.707	0.559	1	0.559	1.25	1	1.031	1.601	0.901	0.75	1.5	1.031	1.25	0.25	1.275	0.559	1.346	0.901	1.458	0.75
29	1.663		1.118	0.5	1.061	0.901	1.25	0.354	1.25	1.346	0.901	0.707	1.275	1	1.768	1.118	1.031	1.458	1.458	0.791	0.707	0.901
30	1.167		0.901	0.707	0.559	1.031	0.25	0.5	1.031	1.061	0.559	0.791	1.25	1.031	1.521	0	1	0	1.118	1.061	1.521	1.25
31	0.791		0.25	1.521	1.052	1.346	0.559	1.061	0.791	1.061	1	0.707	2.151	0.791	0.791	0.5	2.062	1.414	0.791	0.5	0.791	0.559
32	1.118		0.559	1.25	1.111	0.5	1.601	0.75	1.061	0.901	1.031	1.031	0.901	1.061	1.414	0.791	1.677	1.5	0.791	0.559	1.458	0.901
33	1.521		0.25	0.559	1.111	0.75	1.381	0.559	1.275	0.791	0.25	0.559	1.768	0.791	1.346	0.559	1.118	0.75	1.118	0.354	1	1.521
34	1.458		1.031	0.707	1.032	0.851	0.901	1.132	1	0.5	0.901	0.75	1.25	0.901	1.346	1.275	2.236	1	0.75	0	1.118	0.5
35	1.803		1	0.559	1.032	0.461	0.25	0.75	1.25	1.458	1.118	0.791	1.118	0.75	1.677	1.275	1.904	0.791	1.82	1.118	1.25	1.118
36	1.25		1.061	0.5	0.584	0.461	1	1.031	1.118	0.791	0	0.559	0.25	0.5	2.264	1.275	1.953	0.559	2	0.5	1.031	0.25
37	2.574		1.581	1.521	0.744	0.652	1.061	0.791	1.118	1	0.559	1.061	1.061	1.521	1.275	1.25	1.601	0.25	1.275	0.791	1.75	1.275
38	1.521		1	1	0.851	0.707	0.901	0.559	0.75	1.031	0.559	1.031	1.768	0.707	2.016	1.25	1.458	0.5	1.414	0.5	1.118	0.5
39	1.521		0.791	0.75	1.031	1.031	0.791	0.791	1.346	1.031	1.118	0.791	0.559	0.791	2.55	1.581	1.521	0.901	1.25	1.275	1.953	1.601
40	1.803		0.559	0.791	1	0.5	0	0.75	1.275	0.75	0.75	0.901	1.458	0.25	1.458	1.061	1.521	1.118	1.275	1	0.791	0.354
41	1.346		0.791	1.118	0.791	1.118	0.75	0.707	0.791	1.031	0.707	0.901	1.904	0.5	1.275	1.052	0.707	0.25	1.25	1.031	1.061	1.118
42	1.521		0.901	1.118	1.25	1.118	0.791	1	0.901	0.791	0.5	0.791	1.031	0.901	1.459	1.321	1.458	0.5	1.677	1.031	1.275	1.061
43	1.275		1.118	0.559	1.118	0.5	1	0.25	0.791	0.75	0.75	0.791	0.901	0.559	1.032	1.032	0.791	1.5	1.275	0.5	1.458	0.5
44	1.803		1.118	0.559	0.25	1.061	0.75	1	1	1.458	0.707	0.75	1.031	0.901	2.874	1.032	1.458	0.354	1.346	0	1.25	0.5
45	1.803		1.031	1.061	0.559	1.25	0.901	1.346	1.275	0.5	1.5	0.5	1.677	1.031	1.957	0.744	1.275	0.707	1.118	0.791	1.521	0.5
46	1.601		0.791	1.25	0.559	0.5	0.75	0.901	1.118	0.559	0.75	0.25	1.581	0.901	3.156	0.923	1.677	0.791	1.25	1.521	1.031	0.901
47	1.601		0	0.75	1.031	1.031	0.5	0.791	0.559	0.559	1.458	0.707	1.803	0.75	1.321	1.167	1.25	0.791	1.25	0.901	2	0
48	0.901		0.559	1.25	1.458	1.458	1.031	0.5	1.346	1.458	0.354	1.677	0.5	0.707	2.415	1.032	1.414	0.75	0.707	0.791	1.346	0
49	1.346		0.791	1.031	1.23	0.559	0.901	0.5	1	0.75	1.25	1.118	0.901	1.25	1.957	0.744	1.458	0.559	1.346	0.559	1.803	0.707
50	1.031		1.581	0.559	1.031	0.559	0.354	0.5	0.791	0.901	1.25	0.791	0.901	1.118	1.488	1.238	1.25	1.25	1.601	1.061	1.346	0.901
51	1.5		0.901	0.707	1.346	0.707	0.75	1	1.275	1	0.559	1.118	1.25	0.354	1.459	0.619	1.803	1.25	1.346	0.901	1.601	0.354
52	1.118		0.559	1.25	0.707	1.031	1.061	0.5	1.25	0.901	0.559	0.75	0.901	0.791	2.063	1.775	1.275	0.901	1.275	1.118	0.901	0.75
53	1.82		1.275	1.061	0.901	0.791	1.118	0.53	0.354	0.559	0.5	1.031	1.25	0.901	1.868	0.744	1.581	1.25	0.707	0	0.559	0
54	1.677		0.5	0.5	1.031	1.458	0.901	0.707	0.901	0.901	1.061	0.559	1.346	0.75	1.384	1.203	1.118	0.901	1.803	0.901	1.677	0.5
55	2		1.5	0.5	1.061	1.118	1.031	0.901	0	0.75	1.061	1.25	2.016	0.707	1.902	0.413	1.061	1.5	1.82	1.061	2.016	0.559
56	1.768		0.5	1.118	1.275	0.707	1.031	0.901	0.5	0.559	0.901	0.25	1.25	0.559	1.203	0.825	1.521	0	1.118	0.559	1.904	0.75
57	1.275		0.901	0.901	1.275	0.559	1	0.707	1	0.559	0.559	1.031	1.031	1.5	2.585	1.321	1	1.031	0.707	1.118	1	0.354
58	0.901		0.559	0	0.75	1.25	1.118	0.707	0.354	0.75	0.707	0.707	1.031	0.707	1.321	1.032	1.061	0.559	1.346	1.275	2.305	0.901
59	1.768		1.031	1.061	1.346	0	0.791	0.25	0.75	0.75	0.707	1.031	1.25	0.559	3.156	1.203	1.768	0.5	1.82	1.061	1.601	0.791
60	1.5		0.707	0.707	0.75	1	0.354	0.901	0.5	0.901	1.25	0.354	1.677	0.559	1.857	1.502	1.25	0.559	1.803	0	1.25	0.901
61	1.768		0.901	1.031	1.275	1.521	0.5	0.25	0.901	0.791	0.791	1.118	1.414	0.559	1.957	1.321	1.118	0.791	1.118	1.118	1.904	0.75
62	1.581		0.75	0.791	0.354	0.791	1.061	1.118	0.901	0.707	1.061	0.5	2	1.25	2.279	1.167	0.901	1.061	1.118	0.75	1.031	0.707
63	2		0.791	0.707	1	1.031	0.791	0.791	0.791	0.75	1	0.559	1.75	0.5	2.073	1.052	1.346	1.061	0.559	0.901	1.25	0.901
64	1.581		0.75	0.791	0.791	0.791	1.275	1.061	0.559	0.559	1.061	1	2.5	1.25	2.753	1.238	1.953	1.031	1.061	1.031	1.118	1.031
65	1		0.5	0.5	1.031	1.031	0.707	0.25	1.25	1.118	2	0.559	1.677	1	1.65	0.851	0.707	0.5	1.601	0.791	1.031	1.25
66	1.601		1.061	0.354	0.791	0.901	0.791	1.118	0.354	0.75	0.707	0.707	1.25	0.791	1.052	1.032	2.016	0.559	1.118	0.559	1.904	0
67	1.601		0.354	0.791	0.559	0.75	1.031	0.559	1.031	0.901	0.901	0.791	1.521	0.901	2.307	0.923	2.236	1.118	0.559	0.75	1.25	0.5
68	1.458		0.5	0.5	0.791	1.25	1.061	0.901	1.5	0.75	0.75	0.901	1.346	0.901	1.571	1.444	1.25	1.118	1.25	0.75	1.458	0.707
69	1.601		0.559	0.559	0.559	1.031	1.118	1.458	0.75	0.75	0.354	0.901	1.458	0.75	2.493	2.073	1.458	0.559	1.25	1.346	1.118	0.559
70	1.581		0.5	0.75	0	0.559	1.5	1	0.901	1.275	0.791	0.354	1.458	0.5	1.384	1.052	1.458	0.5	1.118	0.901	0.791	0.5
71	1.953		0.901	0	0.901	0	0.791	0.75	1.118	0.559	0.75	0.559	0.901	0.354	1.902	1.032	1.82	0.901	1.458	0.901	1.601	0.25
72	1.521		0.75	0.901	0.354	0.901	0.791	0.901	0.559	0.791	0.791	1.275	1.581	1	2.124	1.663	1.581	0.901	1.118	0.791	1.346	0.707
73	1.75		1.768	0.75	0.5	1.25	0	0.791	0.791	0.354	0.707	1.25	1.601	1.031	2.104	1.502	1.953	0.75	1.031	0.559	1.458	1.061
74	1.346		0.901	0.354	0.791	1.061	1.414	1.25	0.5	0.559	0.707	1.031	1.25	0.707	1.611	1.444	2	0	1.581	1.031	1.25	1
75	1		0.559	1.031	1	0.791	1.118	1	1.425	0.884	0.75	1.031	1	0.559	1.857	0.413	2.55	1.031	0.5	0.901	0.901	0.25
76	2.151		0.354	0.5	0.25	0.559	1.275	1	1.601	0.75	1	1.25	0.559	0.25	1.488	1.032	1.25	0.5	0.559	0.5	1.061	0.25
77	1.5		0.901	0.559	1.25	1	1.768	0.791	1.601	0.791	0.559	0.901	1.5	0.5	1.502	0.923	1.521	0.25	1.118	1.061	1.521	0.25
78	1.677		0.354	0.75	1.275	0.791	1.601	0.791	0.901	0.5	0.25	0.707	1.458	0.901	1.384	0.619	1.601	0.75	0.5	1.118	1.031	1.346
79	1.803		1.061	0.5	0.707	0.559	0.559	0.707	0.354	1.5	1.118	1.118	0.75	0.25	2.032	1.111	2.475	1.25	1.75	0.791	1.5	0.25
80	0.75		0.791	0.791	0.5	1.601	0.901	0.5	0.901	1.458	1.061	1	1.25	0.707	2.866	0.206	1.458	1.061	0.901	0.5	1.275	0.791
81	1.346		0.559	0.791	0.5	0.559	1.346	0.707	1	0.707	0.354	0.901	2.016	0.75	1.384	1.321	2.372	0.791	1.275	0.559	1.031	0
82	1.118		0.901	0.75	1.25	1.803	0.707	0.5	1.275	1.031	0.559	0.75	1	1	1.384	1.032	1.581	0.5	1.458	1.275	1.275	0.559
83	1.061		0.5	1.118	0.559	1.521	1.061	1.25	1	1.118	0.791	1.275	1.031	0.901	2.032	1.032	0.901	0	1.346	0.559	1.458	0.791
84	1.061		0.791	0.901	1.031	1.061	0.901	1.275	1	0.5	1.118	0.791	1.521	1.061	2.69	0.825	2.062	0.791	1.118	0.559	1.581	1.061
85	1.601		0.791	1	0.901	0.707	0.559	0.791	1.25	1	0.559	1.031	1.061	0.791	1.488	1.663	1.346	0.75	1	0.707	1.581	0.901
86	1.458		0.901	0.75	1.031	1.031	0.901	0.5	0.559	1.031	0.75	0.75	2.61	0.559	1.65	0.461	1.601	0.5	0.25	1.25	0.901	1.061
87	1.521		0.354	0.559	1.061	1	0.901	0.791	1.031	1.061	0.5	0.75	1.346	0.75	1.946	1.203	1.031	1.118	1.677	0.791	2.236	0.75
88	1.25		0.559	0.901	0.791	1.521	0.75	0.354	1	0.707	0.5	0.707	1.118	0.75	1.459	1.203	1.458	1.25	1.25	1.061	1.601	0.791
89	1.346		1.061	0.75	1.346	1.346	0.901	0.707	1.346	0.707	0.5	0.901	0.75	1.25	1.902	1.111	1.581	0.25	2	0.791	1.601	0.5
90	1.118		0.901	0.354	0.559	0.901	1.031	1	1.5	0.791	0.559	0.791	1.768	0.559	1.803	0.206	1.768	0.901	0.354	1	1.346	0.75
91	2.236		1.031	0.25	0.901	0.559	0.791	0.791	1.031	1.031	1.25	0.75	1.904	1.768	2.5	0.292	1	0.25	0.707	0.5	1.275	1.061
92	1.118		0.901	0.75	0.791	0.25	0.791	0.791	1.82	1	1.031	0.559	1.25	0.791	1.904	0.292	1.346	1.118	1.768	0.559	1.601	0.559
93	1.031		1.458	1.275	0.901	0.5	1	0.559	0.901	0.707	1.521	1	1.346	1.118	1.458	0.292	1.601	0.354	1.25	0.791	0.901	0.75
94	1.904		1.031	1.346	1.118	1.061	1.118	0.5	0.707	0.707	0.559	1.031	1	1.25	1.488	1.444	2	0.75	1.904	0.791	0.707	0.5
95	1.82		1.061	0.75	0.791	0.791	0.901	0.75	1.118	0.75	0.901	0.559	1.953	0.5	1.384	1.032	1.803	1.031	1.25	0.707	1.953	0.75
96	0.707		0.75	0.791	0.901	1.346	0.791	0.901	0.707	0.791	0.791	0.791	1.275	1.031	1.571	0.744	1.25	1.118	1.75	0.559	0.901	0.5
97	0.901		1.118	1.458	1.601	1.346	0.791	1.118	1.25	0.5	0.75	1.25	0.75	1.031	1.502	1.111	2.136	0.901	1.581	0.791	1	0.707
98	1		0.559	1.25	1.581	1.118	1.346	0.791	1.275	1.25	0.707	0.901	0.791	0.791	1.502	0.825	1.521	0.25	0.901	0.791	1.275	1.061
99	1.275		0.707	0.559	1.25	1.031	0.901	1.031	1.75	0.75	1.25	0.559	1.061	0	1.238	0.652	1.346	0.791	0.901	0.791	1.803	0.901
100	1.414		0.75	0.75	0.5	1.061	1	1.118	1.25	0.707	0.791	0.707	2.151	0.354	1.611	0.461	2.25	0.559	1.601	1.118	1.25	1.25
101	2.761	Ave	0.82936	0.81358	0.92912	0.97547	0.84162	0.78314	0.9818	0.89304	0.83035	0.84503	1.34931	0.8686	1.7733	1.03156	1.52343	0.78532	1.21665	0.81483	1.33725	0.79043
102	1.953	SE	0.0315388	0.0325804	0.0331686	0.0600862	0.0357406	0.027047	0.0365284	0.0299046	0.0307653	0.0264846	0.0435411	0.0336126	0.0511837	0.0404748	0.0429489	0.0416167	0.042545	0.0323668	0.0379574	0.037559
103	1.953
104	2.236
105	1.25			Ave	SE
106	1.118		OB	1.7986	0.0437657
107	2		Psa3-1h	0.92912	0.0331686
108	0.791		R23-1h	0.97547	0.0600862
109	1.25		Psa3-4h	1.7733	0.0511837
110	1.768		R23-4h	1.03156	0.0404748
111	3.758		Psa1-1h	0.82936	0.0315388
112	1.601		Psa1-hopR1-1h	0.81358	0.0325804
113	2.016		Psa1-4h	1.34931	0.0435411
114	1.768		Psa1-hopR1-4h	0.8686	0.0336126
115	2.372		Psa3-1h	0.84162	0.0357406
116	1.768		Psa3-hopR1-1h	0.78314	0.027047
117	2.016		Psa3-4h	1.52343	0.0429489
118	2.016		Psa3-hopR1-4h	0.78532	0.0416167
119	1.601		Psa5-1h	0.9818	0.0365284
120	2.016		Psa5-hopR1-1h	0.89304	0.0299046
121	1.275		Psa5-4h	1.21665	0.042545
122	1.75		Psa5-hopR1-4h	0.81483	0.0323668
123	1.768		Psa6-1h	0.83035	0.0307653
124	1		Psa6-hopR1-1h	0.84503	0.0264846
125	1.25		Psa6-4h	1.33725	0.0379574
126	2.795		Psa6-hopR1-4h	0.79043	0.037559
127	1.25
128	2.062
129	2.761
130	2.358
131	1.768
132	2.236
133	1.904
134	2.151
135	1.768
136	2.5
137	2.016
138	2.016
139	2.512
140	1.414
141	2.75
142	1.414
143	1.677
144	2.121
145	1.768
146	1.768
147	3.041
148	1.803
149	1.677
150	2.305
151	3.095
152	2.975
153	3.142
154	2.61
155	2.975
156	1.65
157	2.682
158	2.975
159	1.763
160	2.518
161	2.484
162	2.406
163	2.042
164	2.932
165	2.806
166	2.352
167	1.857
168	2.954
169	2.682
170	2.552
171	2.484
172	0.923
173	3.046
174	1.775
175	1.902
176	2.518
177	2.484
178	1.167
179	1.663
180	2.484
181	2.768
182	2.714
183	2.279
184	2.232
185	3.156
186	2.124
187	2.307
188	2.406
189	2.063
190	1.444
191	2.975
192	2.954
193	2.406
194	2.51
195	2.063
196	1.957
197	1.902
198	2.888
199	2.352
200	2.932
Ave	1.7986
SE	0.0437657

## Sheet: Fig4EF
Target Name	Sample Name	Ct(SDM)			Genometrtic mean		Target Name	Sample Name	Ct(SDM)				Ave	SE	TTEST
AcAct	Control	18.59	17.796	0.576743	0.635516		AcPR1-1	Control	22.44	22.836	1.31585	2.07053	1.10908	0.260247		Control	1.10908	0.260247
AcAct	Control	17.6		1.14552	1.14552		AcPR1-1	Control	22.82		1.01115	0.882703				Psa3-24	12.8821	2.01135
AcAct	Control	17.87		0.95	0.924023		AcPR1-1	Control	22.89		0.963262	1.04247				hopR1-24	24.179	3.22285
AcAct	Control	16.62		2.25949	1.99446		AcPR1-1	Control	21.77		2.09362	1.04972				Psa3-48	24.8636	5.19112
AcAct	Control	18.3		0.705149	0.745355		AcPR1-1	Control	24.26		0.372678	0.5				hopR1-48	20.8775	5.02958
AcAct	Psa24	18.6		0.572759	0.683494		AcPR1-1	Psa3-24	20.74		4.27522	6.25496	12.8821	2.01135
AcAct	Psa24	18.05		0.838568	1.17365		AcPR1-1	Psa3-24	18.8		16.4043	13.9772
AcAct	Psa24	18.9		0.465225	0.695441		AcPR1-1	Psa3-24	19.78		8.31664	11.9588
AcAct	Psa24	18.23		0.740207	1.19416		AcPR1-1	Psa3-24	18.35		22.4089	18.7654
AcAct	Psa24	18.32		0.695441	1.4103		AcPR1-1	Psa3-24	18.59		18.9746	13.4543
AcAct	hopR1-24	18.12		0.798852	1.58118		AcPR1-1	hopR1-24	16.97		58.3233	36.886	24.179	3.22285	0.017772
AcAct	hopR1-24	18.32		0.695441	1.2492		AcPR1-1	hopR1-24	18.26		23.8514	19.0934
AcAct	hopR1-24	17.83		0.976709	1.73027		AcPR1-1	hopR1-24	17.64		36.6566	21.1854
AcAct	hopR1-24	18.34		0.685867	1.29774		AcPR1-1	hopR1-24	18.05		27.5886	21.259
AcAct	hopR1-24	17.9		0.93045	1.56482		AcPR1-1	hopR1-24	17.7		35.1633	22.4711
AcAct	Psa48	20.07		0.206756	0.42958		AcPR1-1	Psa3-48	21.49		2.54206	5.91755	24.8636	5.19112
AcAct	Psa48	20.42		0.162217	0.313383		AcPR1-1	Psa3-48	19.5		10.098	32.2226
AcAct	Psa48	20.2		0.18894	0.366275		AcPR1-1	Psa3-48	19.12		13.141	35.8773
AcAct	Psa48	20.37		0.167938	0.358737		AcPR1-1	Psa3-48	19.58		9.55331	26.6304
AcAct	Psa48	19.06		0.416388	0.986917		AcPR1-1	Psa3-48	18.29		23.3605	23.6702
AcAct	hopR1-48	18.85		0.481631	1.11806		AcPR1-1	hopR1-48	19.48		10.239	9.15779	20.8775	5.02958	0.596371
AcAct	hopR1-48	18.76		0.512634	1.30677		AcPR1-1	hopR1-48	17.51		40.1131	30.6965
AcAct	hopR1-48	18.93		0.455651	1.08373		AcPR1-1	hopR1-48	19.42		10.6738	9.84916
AcAct	hopR1-48	19.2		0.37788	0.924023		AcPR1-1	hopR1-48	18.52		19.918	21.5557
AcAct	hopR1-48	19.4		0.328964	0.724973		AcPR1-1	hopR1-48	18.25		24.0173	33.1285
AcUBQ	Control	19.41	18.896	0.700278			AcPR1-2	Control	34.09	33.658	0.741234	1.16635	1.43705	0.463068		Control	1.43705	0.463068
AcUBQ	Control	18.7		1.14552			AcPR1-2	Control	32.25		2.65369	2.31659				Psa3-24	2119.35	477.502
AcUBQ	Control	19.05		0.898755			AcPR1-2	Control	32.36		2.45888	2.66106				hopR1-24	8598.88	2350.93
AcUBQ	Control	18.08		1.76052			AcPR1-2	Control	35.33		0.313818	0.157345				Psa3-48	19686.9	4672.65
AcUBQ	Control	19.24		0.787854			AcPR1-2	Control	34.26		0.65884	0.883928				hopR1-48	7527.4	2418.98
AcUBQ	Psa24	19.19		0.815637			AcPR1-2	Psa3-24	24.44		595.517	871.284	2119.35	477.502
AcUBQ	Psa24	18.18		1.64262			AcPR1-2	Psa3-24	22.77		1895.02	1614.64
AcUBQ	Psa24	18.84		1.03958			AcPR1-2	Psa3-24	23.07		1539.24	2213.33
AcUBQ	Psa24	17.95		1.92652			AcPR1-2	Psa3-24	22.35		2535.4	2123.16
AcUBQ	Psa24	17.38		2.85997			AcPR1-2	Psa3-24	21.28		5322.91	3774.32
AcUBQ	hopR1-24	17.25		3.12965			AcPR1-2	hopR1-24	19.56		17535.6	11090.2	8598.88	2350.93	0.0270318
AcUBQ	hopR1-24	17.73		2.24389			AcPR1-2	hopR1-24	21.49		4601.86	3683.85
AcUBQ	hopR1-24	17.28		3.06524			AcPR1-2	hopR1-24	20.11		11977.2	6922.13
AcUBQ	hopR1-24	17.6		2.45547			AcPR1-2	hopR1-24	21.06		6199.77	4777.37
AcUBQ	hopR1-24	17.5		2.63171			AcPR1-2	hopR1-24	19		25852.2	16520.8
AcUBQ	Psa48	19.06		0.892547			AcPR1-2	Psa3-48	21.28		5322.91	12391	19686.9	4672.65
AcUBQ	Psa48	19.62		0.605417			AcPR1-2	Psa3-48	21.57		4353.62	13892.3
AcUBQ	Psa48	19.39		0.710054			AcPR1-2	Psa3-48	20.44		9528.28	26014
AcUBQ	Psa48	19.28		0.76631			AcPR1-2	Psa3-48	20.04		12572.6	35046.9
AcUBQ	Psa48	17.67		2.33918			AcPR1-2	Psa3-48	20.24		10945.1	11090.2
AcUBQ	hopR1-48	17.52		2.59548			AcPR1-2	hopR1-48	22.23		2755.31	2464.36	7527.4	2418.98	0.0496149
AcUBQ	hopR1-48	17.16		3.3311			AcPR1-2	hopR1-48	20.04		12572.6	9621.19
AcUBQ	hopR1-48	17.53		2.57755			AcPR1-2	hopR1-48	20.85		7171.21	6617.18
AcUBQ	hopR1-48	17.72		2.25949			AcPR1-2	hopR1-48	22.13		2953.07	3195.89
AcUBQ	hopR1-48	18.22		1.5977			AcPR1-2	hopR1-48	20.18		11409.9	15738.4
							AcPR4	Control	27.11	26.19	0.528509	0.831622	1.03178	0.134516		Control	1.03178	0.134516
							AcPR4	Control	26.26		0.952638	0.831622				Psa3-24	230.84	43.2926
							AcPR4	Control	25.73		1.37554	1.48865				hopR1-24	214.357	36.7025
							AcPR4	Control	24.94		2.37841	1.19251				Psa3-48	821.076	143.202
							AcPR4	Control	26.91		0.607097	0.814508				hopR1-48	331.634	109.313
							AcPR4	Psa3-24	20.07		69.551	101.758	230.84	43.2926
							AcPR4	Psa3-24	18.39		222.861	189.887
							AcPR4	Psa3-24	18.28		240.518	345.849
							AcPR4	Psa3-24	18.21		252.476	211.425
							AcPR4	Psa3-24	17.44		430.539	305.282
							AcPR4	hopR1-24	17.17		519.147	328.329	214.357	36.7025	0.778881
							AcPR4	hopR1-24	18.98		148.056	118.521
							AcPR4	hopR1-24	18.09		274.374	158.573
							AcPR4	hopR1-24	18.09		274.374	211.425
							AcPR4	hopR1-24	17.55		398.932	254.938
							AcPR4	Psa3-48	18.75		173.645	404.221	821.076	143.202
							AcPR4	Psa3-48	17.77		342.509	1092.94
							AcPR4	Psa3-48	17.99		294.067	802.857
							AcPR4	Psa3-48	17.47		421.679	1175.45
							AcPR4	Psa3-48	16.91		621.668	629.909
							AcPR4	hopR1-48	19.76		86.2229	77.1182	331.634	109.313	0.0263803
							AcPR4	hopR1-48	17.35		458.253	350.677
							AcPR4	hopR1-48	18.23		249	229.763
							AcPR4	hopR1-48	18.23		249	269.474
							AcPR4	hopR1-48	17.14		530.056	731.138

## Sheet: FigS5A
	weight	colony	dillution	cfu
Psa3-1	0.33	100	10000	3.0303e+06	6.48149					Psa3	6.56216	0.059154
Psa3-2	0.23	90	10000	3.91304e+06	6.59251					TA08	5.87226	0.0924443
Psa3-3	0.16	110	10000	6875000	6.83727					TA15	4.41896	0.375758
Psa3-1	0.24	73	10000	3.04167e+06	6.48311					TC07	6.00409	0.126887
Psa3-2	0.28	77	10000	2750000	6.43933					TC13	5.01984	0.0813103
Psa3-3	0.26	90	10000	3.46154e+06	6.53927	6.56216	0.059154			TC14	5.6884	0.047364
A8-1	0.29	30	10000	1.03448e+06	6.01472					TD35	3.30248	0.200055
A8-2	0.2	16	10000	800000	5.90309					TE04	5.96742	0.0461819
A8-3	0.24	12	10000	500000	5.69897	5.87226	0.0924443	0.000324731		TH14	5.45715	0.15903
A15-1	0.39	0.2	10000	5128.21	3.70997					TJ35	1.58799	0.100573
A15-2	0.36	1.3	10000	36111.1	4.55764					TJ40	2.82772	0.386337
A15-3	0.41	4	10000	97561	4.98928	4.41896	0.375758	7.67289e-05		TK18	1.54285	0.00998774
C7-1	0.33	58	10000	1.75758e+06	6.24491					TK40	2.83142	0.380704
C7-2	0.23	15	10000	652174	5.81436					TL23	4.73413	0.390766
C7-3	0.39	35	10000	897436	5.953	6.00409	0.126887	0.00233955		TL26	5.49659	0.166101
C13-1	0.19	2.5	10000	131579	5.11919					TM22	5.52783	0.0160539
C13-2	0.36	2.6	10000	72222.2	4.85867					TM33	6.1466	0.0337967
C13-3	0.29	3.5	10000	120690	5.08167	5.01984	0.0813103	1.29919e-06		TN40	4.5577	0.340358
C14-1	0.33	20	10000	606061	5.78252					TP3	5.05228	0.103941
C14-2	0.42	18	10000	428571	5.63202					TQ26	4.72416	0.12153
C14-3	0.38	17	10000	447368	5.65067	5.6884	0.047364	2.99745e-05		TR05	4.70164	0.380569
D35-1	0.25	0.02	10000	800	2.90309					TR23	3.99257	0.0435059
D35-2	0.3	0.1	10000	3333.33	3.52288					TS01	5.92135	0.0740412
D35-3	0.33	0.1	10000	3030.3	3.48149	3.30248	0.200055	1.51068e-07		TT37	5.97954	0.14939
E4-1	0.36	27	10000	750000	5.87506					TU11	5.39177	0.284339
E4-2	0.3	31	10000	1.03333e+06	6.01424					TU31	6.15958	0.0329087
E4-3	0.33	34	10000	1.0303e+06	6.01296	5.96742	0.0461819	0.000339071		TU37	5.97954	0.14939
H14-1	0.37	7	10000	189189	5.2769					TV06	6.12991	0.0116116
H14-2	0.22	4.6	10000	209091	5.32034					TV14	5.69033	0.00536999
H14-3	0.37	22	10000	594595	5.77422	5.45715	0.15903	8.02912e-05		TW16	5.31138	0.118135
J35-1	0.4	0.002	10000	50	1.69897					TW19	6.07986	0.0420577
J35-2	0.41	0.001	10000	24.3902	1.38722					TX17	5.87048	0.0447749
J35-3	0.42	0.002	10000	47.619	1.67778	1.58799	0.100573	6.25274e-10		TX21	5.47478	0.0341755
J40-1	0.26	0.003	10000	115.385	2.06215					TY11	5.98096	0.10095
J40-2	0.22	0.029	10000	1318.18	3.11998					TY14	6.04907	0.0239767
J40-3	0.22	0.044	10000	2000	3.30103	2.82772	0.386337	2.27975e-06		TY16	2.91809	0.0109066
K18-1	0.28	1	10	35.7143	1.55284					TZ32	6.37489	0.0898222
K18-2	0.3	1	10	33.3333	1.52288					TZ39	6.22246	0.0427819
K18-3	0.28	1	10	35.7143	1.55284	1.54285	0.00998774	1.21744e-10
K40-1	0.22	38	10	1727.27	3.23736
K40-2	0.28	43	10	1535.71	3.18631
K40-3	0.34	4	10	117.647	2.07058	2.83142	0.380704	2.09951e-06
L23-1	0.28	44	1000	157143	5.19629
L23-2	0.42	47	1000	111905	5.04885
L23-3	0.32	29	100	9062.5	3.95725	4.73413	0.390766	0.000260544
L26-1	0.37	23	10000	621622	5.79353
L26-2	0.4	12	10000	300000	5.47712
L26-3	0.32	53	1000	165625	5.21913	5.49659	0.166101	0.000119581
M22-1	0.26	89	1000	342308	5.53442
M22-2	0.35	110	1000	314286	5.49732
M22-3	0.32	114	1000	356250	5.55175	5.52783	0.0160539	6.88764e-06
M33-1	0.3	36	10000	1200000	6.07918
M33-2	0.34	52	10000	1.52941e+06	6.18452
M33-3	0.3	45	10000	1500000	6.17609	6.1466	0.0337967	0.00234267
N40-1	0.22	20	1000	90909.1	4.95861
N40-2	0.22	15	1000	68181.8	4.83367
N40-3	0.25	19	100	7600	3.88081	4.5577	0.340358	6.74307e-05
P3-1	0.32	52	1000	162500	5.21085
P3-2	0.35	43	1000	122857	5.0894
P3-3	0.32	23	1000	71875	4.85658	5.05228	0.103941	2.58859e-06
Q26-1	0.33	10	1000	30303	4.48149
Q26-2	0.25	18	1000	72000	4.85733
Q26-3	0.22	15	1000	68181.8	4.83367	4.72416	0.12153	1.06131e-06
R5-1	0.39	60	100	15384.6	4.18709
R5-2	0.37	103	1000	278378	5.44464
R5-3	0.37	11	1000	29729.7	4.47319	4.70164	0.380569	0.000201698
R23-1	0.42	3.8	1000	9047.62	3.95653
R23-2	0.35	4.2	1000	12000	4.07918
R23-3	0.32	2.8	1000	8750	3.94201	3.99257	0.0435059	1.81711e-08
S1-1	0.16	17.8	10000	1112500	6.0463
S1-2	0.15	12.7	10000	846667	5.92771
S1-3	0.24	14.8	10000	616667	5.79005	5.92135	0.0740412	0.00034781
T37-1	0.25	12	10000	480000	5.68124
T37-2	0.3	39	10000	1300000	6.11394
T37-3	0.23	32	10000	1.3913e+06	6.14342	5.97954	0.14939	0.00293491
U11-1	0.22	1.5	10000	68181.8	4.83367
U11-2	0.26	9.8	10000	376923	5.57625
U11-3	0.23	13.4	10000	582609	5.76538	5.39177	0.284339	0.000734638
U31-1	0.4	61	10000	1525000	6.18327
U31-2	0.34	54	10000	1.58824e+06	6.20091
U31-3	0.37	46	10000	1.24324e+06	6.09456	6.15958	0.0329087	0.0027596
U37-1	0.16	23.5	10000	1468750	6.16695
U37-2	0.14	13.2	10000	942857	5.97445
U37-3	0.18	48	10000	2.66667e+06	6.42597	6.18912	0.130814	0.0182443
V6-1	0.39	55	10000	1.41026e+06	6.1493
V6-2	0.42	54	10000	1.28571e+06	6.10914
V6-3	0.51	69	10000	1.35294e+06	6.13128	6.12991	0.0116116	0.00161419
V14-1	0.58	29	10000	500000	5.69897
V14-2	0.59	29	10000	491525	5.69155
V14-3	0.48	23	10000	479167	5.68049	5.69033	0.00536999	2.0568e-05
W16-1	0.36	12.3	10000	341667	5.5336
W16-2	0.36	6.7	10000	186111	5.26977
W16-3	0.37	5	10000	135135	5.13077	5.31138	0.118135	1.30667e-05
W19-1	0.36	45	10000	1250000	6.09691
W19-2	0.36	50	10000	1.38889e+06	6.14267
W19-3	0.37	37	10000	1000000	6	6.07986	0.0420577	0.00111371
X17-1	0.34	30	10000	882353	5.94564
X17-2	0.34	21	10000	617647	5.79074
X17-3	0.4	30	10000	750000	5.87506	5.87048	0.0447749	0.000129907
X21-1	0.26	7	10000	269231	5.43012
X21-2	0.18	5.1	10000	283333	5.4523
X21-3	0.29	10.1	10000	348276	5.54192	5.47478	0.0341755	5.82303e-06
Y11-1	0.28	17	10000	607143	5.78329
Y11-2	0.28	31	10000	1.10714e+06	6.0442
Y11-3	0.23	30	10000	1.30435e+06	6.11539	5.98096	0.10095	0.00108094
Y14-1	0.19	20	10000	1.05263e+06	6.02228
Y14-2	0.3	32	10000	1.06667e+06	6.02803
Y14-3	0.28	35	10000	1.25e+06	6.09691	6.04907	0.0239767	0.000643321
Y16-1	0.46	4	100	869.565	2.9393
Y16-2	0.5	4	100	800	2.90309
Y16-3	0.49	4	100	816.327	2.91186	2.91809	0.0109066	1.14277e-09
Z32-1	0.17	60	10000	3.52941e+06	6.5477
Z32-2	0.21	37	10000	1.7619e+06	6.24598
Z32-3	0.28	60	10000	2.14286e+06	6.33099	6.37489	0.0898222	0.116723
Z39-1	0.36	69	10000	1.91667e+06	6.28255
Z39-2	0.29	40	10000	1.37931e+06	6.13966
Z39-3	0.29	51	10000	1.75862e+06	6.24517	6.22246	0.0427819	0.00733333

[truncated: 4 more sheets: FigA5B, FigS5C, FigS7, FigS8]
